# Supplementary material for: Visible light-induced intermolecular radical addition: facile access to γ-ketoesters from alkyl-bromocarboxylates and enamines
Source: Royal Society of Chemistry journal article supplement (doi:10.1039/c4cc05590j), 2014-01-01

# Visible light-Induced Intermolecular Addition Reactions between Alkyl-Bromocarboxylates and Enamines

Bei Hu,<sup>a</sup> Haixia Chen,<sup>b</sup> Yan Liu,<sup>b</sup> Wuheng Dong,<sup>a</sup> Kai Ren,<sup>a</sup> Xiaomin Xie,<sup>a</sup> Hao Xu<sup>b</sup> and  
Zhaoguo Zhang<sup>\*a</sup>

<sup>a</sup>*School of Chemistry and Chemical Engineering, Shanghai Jiao Tong University, 800  
Dongchuan Road, Shanghai 200240, China.*

<sup>b</sup>*Department of Applied Chemistry, College of Science, Nanjing University of Technology,  
Nanjing 210009, China.  
zhaoguo@sjtu.edu.cn*

## Contents

|                                                                                                                                                                 |     |
|-----------------------------------------------------------------------------------------------------------------------------------------------------------------|-----|
| 1. General Information .....                                                                                                                                    | S2  |
| 2. Preparation of substrate .....                                                                                                                               | S2  |
| 3. A general procedure for Ru(bpy) <sub>3</sub> Cl <sub>2</sub> -catalyzed reaction between enamines and alkyl<br>bromocarboxylates under visible light .....   | S4  |
| 4. The control experiment of the reaction conducted in the different temperature without<br>visible light and the experiment of turn on and off the light ..... | S4  |
| 5. Spectral data for substrates and products .....                                                                                                              | S5  |
| 6. Reference .....                                                                                                                                              | S14 |
| 7. The NOE experiment of N-(1-phenylprop-1-en-1-yl)piperidine (11) .....                                                                                        | S15 |
| 8. NMR spectra of the products .....                                                                                                                            | S16 |

## 1. General Information

Unless otherwise noted, all reactions were carried out under an atmosphere of nitrogen using standard Schlenk techniques. Materials were purchased from commercial suppliers and used without further purification. Anhydrous DMF, CH<sub>3</sub>CN, DMSO, DCM were freshly distilled from calcium hydride, Anhydrous PhMe was freshly distilled from Sodium. <sup>1</sup>H NMR and <sup>13</sup>C NMR spectra were recorded on a 400 MHz spectrometer. The chemical shifts for <sup>1</sup>H NMR were recorded in ppm downfield from tetramethylsilane (TMS) with the solvent resonance as the internal standard. The chemical shifts for <sup>13</sup>C NMR were recorded in ppm downfield using the central peak of deuteriochloroform (77.00 ppm) as the internal standard. Coupling constants (*J*) are reported in Hz and refer to apparent peak multiplications. Analytical GC was performed on an Agilent 7890A with FID detector. HRMS were performed under ESI ionization technique on a Waters Micromass Q-TOF Premier Mass Spectrometer. Flash column chromatography was performed on silica gel (300-400 mesh).

## 2. Preparation of substrates

### 2.1 Representative procedure for the preparation of enamines. (1a-1l)<sup>1</sup>

To a solution of acetophenone (10.0 g, 86.0 mmol) and piperidine (42.5 g, 516.0 mmol) in anhydrous hexane (200 mL), was added TiCl<sub>4</sub> (17.8 g, 86.0 mmol) over 30 min at 0 °C. The reaction mixture was stirred at room temperature for 24 h and filtered. The filtrate was evaporated under vacuum to give colorless oil, which was distilled under reduced pressure (1 mmHg, 99 °C) to give N-(1-styryl)piperidine (**1b**) as a pale yellow liquid (12.0 g, 82% yield). <sup>1</sup>H NMR (400 MHz, CDCl<sub>3</sub>) δ 7.48–7.45 (m, 2H), 7.33–7.28 (m, 3H), 4.24 (s, 1H), 4.15 (s, 1H), 2.82–2.79 (m, 4H), 1.62–1.53 (m, 6H). <sup>13</sup>C NMR (100 MHz, CDCl<sub>3</sub>) δ 158.0, 140.3, 128.0, 127.7, 127.7, 90.1, 50.5, 26.0, 24.5.

### 2.2 A General procedure for the preparation of cinnamyl 2-bromopropanoate.<sup>7</sup>

To a mixture of 5.9 g (80.0 mmol) of propionic acid and 4.3 g (16.0 mmol) of tribromophosphine in a 50 ml three-necked flask, bromine (25.6 g, 160.1mmol) was added dropwise at 80 °C over 30 min. After the addition is complete, the solution was heated over a

period of 3 hours. The excess bromine and hydrogen bromide are removed under reduced pressure. To a solution of 4.0 g (30.0 mmol) of cinnamyl alcohol, 0.4 g (3.0 mmol) of DMAP and 4.8 g (60.0 mmol) of pyridine in 30 mL DCM was cooled at 0 °C. The  $\alpha$ -bromopropanoyl bromide was added dropwise slowly at such a rate to maintain the internal temperature below 20 °C for 30 min. After completion, the reaction was quenched with H<sub>2</sub>O (30 mL) and extracted with DCM (3×30 mL). The combined organic extracts were dried over Na<sub>2</sub>SO<sub>4</sub> and the solvent was removed under reduced pressure. The crude product was purified by silica-gel column chromatography to give cinnamyl 2-bromopropanoate as pale yellow oil (5.7 g, 70% yield). <sup>1</sup>H NMR (400 MHz, CDCl<sub>3</sub>)  $\delta$  7.44–7.24 (m, 5H), 6.71 (d,  $J$  = 16.0 Hz, 1H), 6.29 (dt,  $J$  = 15.6, 6.4 Hz, 1H), 4.83 (dd,  $J$  = 6.0, 0.8 Hz, 2H), 4.42 (q,  $J$  = 6.8 Hz, 1H), 1.86 (d,  $J$  = 7.2 Hz, 3H). <sup>13</sup>C NMR (100 MHz, CDCl<sub>3</sub>)  $\delta$  169.9, 135.9, 134.8, 128.5, 128.1, 126.6, 122.1, 66.3, 40.0, 21.6.

### 2.3 A General procedure for the preparation of allyl 2-bromo-2-phenylacetate.<sup>7</sup>

To a mixture of 17.7 g (130.0 mmol) of phenylacetic acid and 7.0 g (26.0 mmol) of tribromophosphine in a 100 mL three-necked flask, the bromine (41.6 g, 260.0 mmol) was added dropwise at 100 °C over 30 min. After the addition is complete, the solution was heated over a period of 4 hours. The excess bromine and hydrogen bromide are removed under reduced pressure. To a solution of 7.6 g (130.0 mmol) of allyl alcohol and 13.8 g (136.5 mmol) of Et<sub>3</sub>N in 30 mL DCM was cooled at 0 °C. The solution of 2-bromo-2-phenylacetyl bromide in 20 mL was added dropwise slowly at such a rate to maintain the internal temperature below 20 °C for 30 min. After 1h, the reaction was quenched with H<sub>2</sub>O (50 mL) and extracted with DCM (3×50 mL). The combined organic extracts were dried over Na<sub>2</sub>SO<sub>4</sub> and the solvent was removed under reduced pressure to give colorless oil, which was distilled under reduced pressure (2 mmHg, 100 °C) to give allyl 2-bromo-2-phenylacetate as a colorless oil (17.5 g, 53% yield). <sup>1</sup>H NMR (400 MHz, CDCl<sub>3</sub>)  $\delta$  7.57–7.53 (m, 2H), 7.38–7.34 (m, 3H), 5.95–5.85 (m, 1H), 5.38 (s, 1H), 5.32 (dq,  $J$  = 17.2, 1.6 Hz, 1H), 5.25 (dq,  $J$  = 10.4, 1.2 Hz, 1H), 4.69–4.66 (m, 2H). <sup>13</sup>C NMR (100 MHz, CDCl<sub>3</sub>)  $\delta$  167.8, 135.6, 131.0, 129.2, 128.7, 128.6, 118.9, 66.7, 46.5.

### 3. A general procedure for Ru(bpy)<sub>3</sub>Cl<sub>2</sub>-catalyzed reaction between enamines and alkyl bromocarboxylates under visible light

A dried Schlenk tube equipped with a stirrer bar which was evacuated and backfilled with nitrogen was added alkyl bromocarboxylate (1.0 mmol, 181.0 mg), K<sub>2</sub>CO<sub>3</sub> (0.5 mmol, 69 mg), Ru(bpy)<sub>3</sub>Cl<sub>2</sub> (0.01 mmol, 7.48 mg), Et<sub>3</sub>N (0.2 mmol, 20.4 mg), 4-methoxy pyridine (0.2 mmol, 218.2 mg) and enamine (0.5 mmol). Then 2 mL of DMF was added into the reaction tube via a syringe. The reaction mixture was degassed by the freeze-pump-thaw method and then irradiated with a 23W fluorescent household light bulb (distance app. 5 cm) for 24 h. After the completion of the reaction, it was quenched by water and extracted with ethyl acetate (3 x 15 mL). The organic layers were combined and the pure product was obtained by flash column chromatography on silica gel.

### 4. The control experiment of the reaction conducted in the different temperature in the dark.<sup>a</sup>

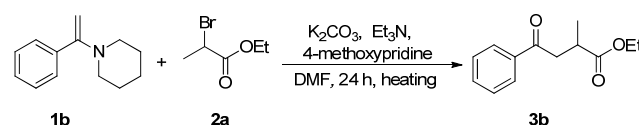

| reaction temp. (°C) | yield <sup>b</sup> (%) |
|---------------------|------------------------|
| 40                  | 5                      |
| 60                  | 10                     |
| 80                  | 8                      |
| 100                 | 5                      |

<sup>a</sup>Conditions: **1b** (0.5 mmol), **2a** (1 mmol), Et<sub>3</sub>N (0.2 mmol), 4-methoxy pyridine (0.2 mmol), base (0.5 mmol), solvent (2 mL), heated from 40 to 100 °C for 24 h. <sup>b</sup>Isolated yields.

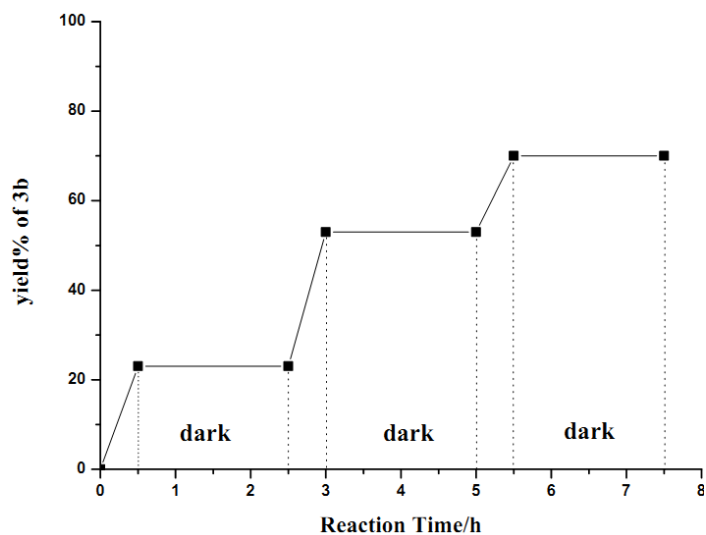

The experiment of turn on and off the light

## 5. Spectral data for substrates and products

### 5.1. Spectral data for substrates

#### N-(1-phenylvinyl)morpholine<sup>1</sup>

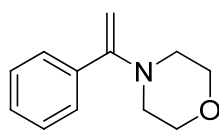

**1a**

Pale yellow liquid, 86% yield (1 mmHg, 120 °C). <sup>1</sup>H NMR (400 MHz, CDCl<sub>3</sub>) δ 7.48–7.45 (m, 2H), 7.33–7.31(m, 3H), 4.33 (s, 1H), 4.19 (s, 1H), 3.78–3.76 (m, 4H), 2.84–2.82 (m, 4H).

<sup>13</sup>C NMR (100 MHz, CDCl<sub>3</sub>) δ 157.0, 139.0, 128.1, 128.0, 127.7, 91.0, 66.8, 49.7.

#### N-(1-phenylvinyl)piperidine<sup>2</sup>

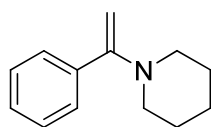

**1b**

Pale yellow liquid, 82% yield (1 mmHg, 99 °C). <sup>1</sup>H NMR (400 MHz, CDCl<sub>3</sub>) δ 7.48–7.45 (m, 2H), 7.33–7.28 (m, 3H), 4.24 (s, 1H), 4.15 (s, 1H), 2.82–2.79 (m, 4H), 1.62–1.53 (m, 6H). <sup>13</sup>C

NMR (100 MHz, CDCl<sub>3</sub>) δ 158.0, 140.3, 128.0, 127.7, 127.7, 90.1, 50.5, 26.0, 24.5.

#### N-(1-phenylvinyl)pyrrolidine<sup>3</sup>

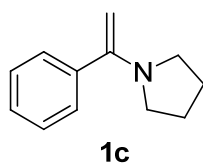

Pale yellow liquid, 88% yield (1 mmHg, 96 °C). <sup>1</sup>H NMR (400 MHz, CDCl<sub>3</sub>) δ 7.43–7.41 (m, 2H), 7.36–7.31 (m, 3H), 3.89 (s, 1H), 3.85 (s, 1H), 3.04–3.00 (m, 4H), 1.91–1.88 (m, 4H). <sup>13</sup>C NMR (100 MHz, CDCl<sub>3</sub>) δ 154.3, 140.5, 127.7, 127.7, 127.4, 84.2, 49.1, 24.9.

#### **N,N-diethyl-1-phenylethanamine**

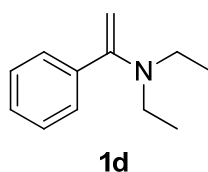

Pale yellow liquid, 85% yield (1 mmHg, 60–61 °C). <sup>1</sup>H NMR (400 MHz, CDCl<sub>3</sub>) δ 7.45–7.41 (m, 2H), 7.33–7.28 (m, 3H), 4.15 (s, 1H), 4.06 (s, 1H), 2.99 (q, *J* = 7.2 Hz, 4H), 1.03 (t, *J* = 7.2 Hz, 6H). <sup>13</sup>C NMR (100 MHz, CDCl<sub>3</sub>) δ 155.0, 141.0, 128.5, 128.2, 127.9, 127.9, 127.6, 90.1, 43.1, 11.6.

#### **N-(1-(p-tolyl)vinyl)piperidine<sup>5</sup>**

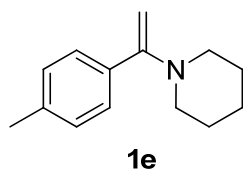

Pale yellow liquid, 79% yield (0.1 mmHg, 78 °C). <sup>1</sup>H NMR (400 MHz, CDCl<sub>3</sub>) δ 7.37–7.34 (m, 2H), 7.14–7.12 (m, 2H), 4.21 (s, 1H), 4.10 (s, 1H), 2.81–2.78 (m, 4H), 2.35 (s, 3H), 1.64–1.58 (m, 6H). <sup>13</sup>C NMR (100 MHz, CDCl<sub>3</sub>) δ 158.0, 137.5, 137.4, 128.7, 127.6, 89.5, 50.5, 6.0, 24.5, 21.1.

#### **N-(1-(4-fluorophenyl)vinyl)piperidine**

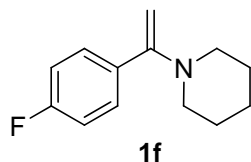

Pale yellow liquid, 83% yield (1 mmHg, 125 °C). <sup>1</sup>H NMR (400 MHz, CDCl<sub>3</sub>) δ 7.46–7.40 (m, 2H), 7.03–6.97 (m, 2H), 4.20 (s, 1H), 4.13 (s, 1H), 2.76–2.79 (m, 4H), 1.64–1.52 (m, 6H); <sup>13</sup>C NMR (100 MHz, CDCl<sub>3</sub>) δ 163.7, 161.3, 157.0, 136.2, 129.2, 129.1, 114.9, 114.7, 90.3,

50.5, 26.0, 24.4.  $^{19}\text{F}$  NMR (376 MHz,  $\text{CDCl}_3$ )  $\delta$  -115.23. HRMS-ESI (m/z): Calculated for  $\text{C}_{13}\text{H}_{16}\text{FN}$  (M + H) $^+$ : 206.1345, Found: 206.1330.

**N-(1-(4-chlorophenyl)vinyl)piperidine<sup>5</sup>**

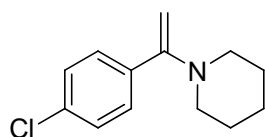

**1g**

Pale yellow liquid, 75% yield (0.06 mmHg, 80–83 °C).  $^1\text{H}$  NMR (400 MHz,  $\text{CDCl}_3$ )  $\delta$  7.44–7.40 (m, 2H), 7.32–7.28 (m, 2H), 4.25 (s, 1H), 4.17 (s, 1H), 2.81–2.78 (m, 4H), 1.66–1.57 (m, 6H).  $^{13}\text{C}$  NMR (100 MHz,  $\text{CDCl}_3$ )  $\delta$  156.9, 138.8, 133.4, 128.9, 128.2, 90.8, 50.5, 25.9, 24.4.

**N-(1-(4-(trifluoromethyl)phenyl)vinyl)piperidine**

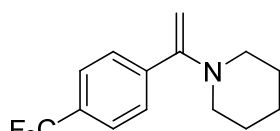

**1h**

Pale yellow liquid, 79% yield (1 mmHg, 128 °C).  $^1\text{H}$  NMR (400 MHz,  $\text{CDCl}_3$ )  $\delta$  7.57 (s, 4H), 4.30 (s, 1H), 4.23 (s, 1H), 2.79–2.77 (m,  $J$  = 5.6 Hz, 4H), 1.65–1.52 (m, 6H).  $^{13}\text{C}$  NMR (100 MHz,  $\text{CDCl}_3$ )  $\delta$  156.8, 144.0, 130.1, 130.0, 129.7, 129.6, 129.4, 129.3, 127.9, 125.59, 125.0, 122.8, 91.9, 50.5, 25.9, 24.4.  $^{19}\text{F}$  NMR (376 MHz,  $\text{CDCl}_3$ )  $\delta$  -62.86. HRMS-ESI (m/z): Calculated for  $\text{C}_{14}\text{H}_{16}\text{F}_3\text{N}$  (M + H) $^+$ : 256.1313, Found: 256.1301.

**N-(1-(4-methoxyphenyl)vinyl)piperidine<sup>5</sup>**

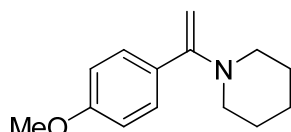

**1i**

Pale yellow liquid, 72% yield (0.1 mmHg, 92–94 °C).  $^1\text{H}$  NMR (400 MHz,  $\text{CDCl}_3$ )  $\delta$  7.40–7.26 (m, 2H), 6.87–6.83 (m, 2H), 4.18 (s, 1H), 4.08 (s, 1H), 3.81 (s, 3H), 2.81–2.78 (m, 4H), 1.63–1.54 (m, 6H).  $^{13}\text{C}$  NMR (100 MHz,  $\text{CDCl}_3$ )  $\delta$  159.4, 157.6, 132.7, 128.7, 113.36, 89.0, 77.3, 77.0, 76.7, 55.2, 50.5, 26.0, 24.6.

**N-(1-(o-tolyl)vinyl)piperidine**

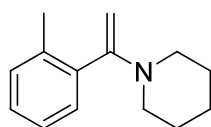

**1j**

Pale yellow liquid, 83% yield (1 mmHg, 125 °C). <sup>1</sup>H NMR (400 MHz, CDCl<sub>3</sub>) δ 7.23–7.11 (m, 4H), 4.13 (s, 1H), 3.83 (s, 1H), 2.79–2.77 (m, 4H), 2.35 (s, 3H), 1.56–1.52 (m, 6H). <sup>13</sup>C NMR (100 MHz, CDCl<sub>3</sub>) δ 156.4, 140.2, 136.4, 129.8, 129.6, 127.3, 125.2, 87.6, 48.8, 25.8, 24.5, 19.8. HRMS-ESI (m/z): Calculated for C<sub>14</sub>H<sub>19</sub>N (M + H)<sup>+</sup>: 202.1596, Found: 202.1656.

**N-(1-phenylprop-1-en-1-yl)piperidine<sup>6</sup>**

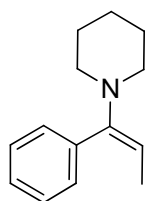

**1k**

Pale yellow liquid, 80% yield (1 mmHg, 95–97 °C). <sup>1</sup>H NMR (400 MHz, CDCl<sub>3</sub>) δ 7.34–7.33 (m, 3H), 7.29–7.26 (m, 2H), 4.67 (q, *J* = 6.8 Hz, 1H), 2.68–2.66 (m, 4H), 1.59–1.49 (m, 9H). <sup>13</sup>C NMR (100 MHz, CDCl<sub>3</sub>) δ 151.1, 138.6, 129.7, 127.8, 127.1, 99.1, 50.6, 26.2, 24.6, 13.9. HRMS-ESI (m/z): Calculated for C<sub>14</sub>H<sub>19</sub>N (M + H)<sup>+</sup>: 202.1596, Found: 202.1664.

**N-(3,4-dihydronaphthalen-1-yl)piperidine<sup>6</sup>**

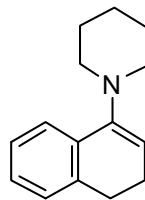

**1l**

Pale yellow liquid, 70% yield (0.7 mmHg, 120–125 °C). <sup>1</sup>H NMR (400 MHz, CDCl<sub>3</sub>) δ 7.44 (d, *J* = 7.2 Hz, 1H), 7.22–7.17 (m, 1H), 7.14–7.12 (m, 2H), 5.24 (t, *J* = 4.8 Hz, 1H), 2.76 (s, 4H), 2.69–2.65 (m, 2H), 2.26–2.18 (m, 2H), 1.71 (dd, *J* = 11.6, 6.0 Hz, 4H), 1.57 (s, 2H). <sup>13</sup>C NMR (100 MHz, CDCl<sub>3</sub>) δ 148.6, 138.0, 132.9, 127.5, 126.5, 126.0, 123.4, 106.7, 52.0, 28.7, 26.3, 24.7, 22.5. HRMS-ESI (m/z): Calculated for C<sub>15</sub>H<sub>19</sub>N (M + H)<sup>+</sup>: 214.1596, Found: 214.1628.

**cinnamyl 2-bromopropanoate<sup>7</sup>**



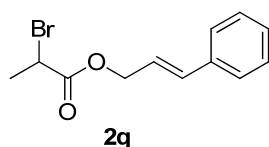

Pale yellow oil, 70% yield.  $^1\text{H}$  NMR (400 MHz,  $\text{CDCl}_3$ )  $\delta$  7.44–7.24 (m, 5H), 6.71 (d,  $J$  = 16.0 Hz, 1H), 6.29 (dt,  $J$  = 15.6, 6.4 Hz, 1H), 4.83 (dd,  $J$  = 6.0, 0.8 Hz, 2H), 4.42 (q,  $J$  = 6.8 Hz, 1H), 1.86 (d,  $J$  = 7.2 Hz, 3H).  $^{13}\text{C}$  NMR (100 MHz,  $\text{CDCl}_3$ )  $\delta$  169.9, 135.9, 134.8, 128.5, 128.1, 126.6, 122.1, 66.3, 40.0, 21.6.

#### allyl 2-bromo-2-phenylacetate

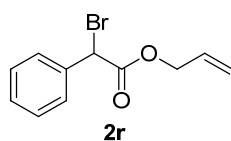

Colorless oil, 53% yield (2 mmHg, 100 °C).  $^1\text{H}$  NMR (400 MHz,  $\text{CDCl}_3$ )  $\delta$  7.57–7.53 (m, 2H), 7.38–7.34 (m, 3H), 5.95–5.85 (m, 1H), 5.38 (s, 1H), 5.32 (dq,  $J$  = 17.2, 1.6 Hz, 1H), 5.25 (dq,  $J$  = 10.4, 1.2 Hz, 1H), 4.69–4.66 (m, 2H).  $^{13}\text{C}$  NMR (100 MHz,  $\text{CDCl}_3$ )  $\delta$  167.8, 135.6, 131.0, 129.2, 128.7, 128.6, 118.9, 66.7, 46.5.

## 5.2. Spectral data for products

#### ethyl 2-methyl-4-oxo-4-phenylbutanoate<sup>8</sup>

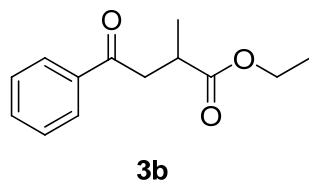

Yellow liquid, 94% yield,  $^1\text{H}$  NMR (400 MHz,  $\text{CDCl}_3$ )  $\delta$  8.00–7.92 (m, 2H), 7.59–7.53 (m, 1H), 7.51–7.41 (m, 2H), 4.15 (q,  $J$  = 7.2 Hz, 2H), 3.48 (dd,  $J$  = 17.6, 8.0 Hz, 1H), 3.16–3.06 (m, 1H), 3.00 (dd,  $J$  = 17.6, 5.6 Hz, 1H), 1.29–1.22 (m, 6H).  $^{13}\text{C}$  NMR (100 MHz,  $\text{CDCl}_3$ )  $\delta$  198.0, 175.9, 136.7, 133.1, 128.5, 127.9, 60.5, 41.9, 35.0, 17.2, 14.1.

#### ethyl 2-methyl-4-oxo-4-(p-tolyl)butanoate

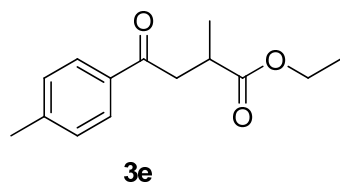

Yellow liquid, 92% yield,  $^1\text{H}$  NMR (400 MHz,  $\text{CDCl}_3$ )  $\delta$  7.94–7.79 (m, 2H), 7.26–7.24 (m,

2H), 4.14 (q,  $J = 7.2$  Hz, 2H), 3.44 (dd,  $J = 17.6, 8.0$  Hz, 1H), 3.15–3.05 (m, 1H), 2.98 (dd,  $J = 17.6, 5.6$  Hz, 1H), 2.40 (s, 3H), 1.28–1.22 (m, 6H).  $^{13}\text{C}$  NMR (100 MHz,  $\text{CDCl}_3$ )  $\delta$  197.4, 175.7, 143.7, 134.1, 129.0, 127.9, 60.3, 41.6, 34.9, 21.4, 17.1, 14.0. HRMS-ESI ( $m/z$ ): Calculated for  $\text{C}_{14}\text{H}_{18}\text{O}_3$  ( $\text{M} + \text{H}$ ) $^+$ : 235.1334, Found: 235.1337.

**ethyl 4-(4-fluorophenyl)-2-methyl-4-oxobutanoate**

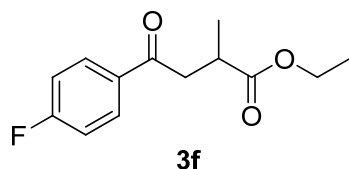

Yellow liquid, 92% yield,  $^1\text{H}$  NMR (400 MHz,  $\text{CDCl}_3$ )  $\delta$  8.04–7.95 (m, 2H), 7.17–7.09 (m, 2H), 4.15 (q,  $J = 7.2$  Hz, 2H), 3.45 (dd,  $J = 17.6, 8.0$  Hz, 1H), 3.16–3.06 (m, 1H), 2.96 (dd,  $J = 17.6, 5.6$  Hz, 1H), 1.26 (dd,  $J = 14.4, 7.2$  Hz, 6H).  $^{13}\text{C}$  NMR (100 MHz,  $\text{CDCl}_3$ )  $\delta$  196.4, 175.8, 166.9, 164.4, 133.1, 130.6, 130.5, 115.7, 115.5, 60.5, 41.7, 35.0, 17.2, 14.1.  $^{19}\text{F}$  NMR (376 MHz,  $\text{CDCl}_3$ )  $\delta$  -105.57. HRMS-ESI ( $m/z$ ): Calculated for  $\text{C}_{13}\text{H}_{15}\text{FO}_3$  ( $\text{M} + \text{Na}$ ) $^+$ : 261.0903, Found: 261.0707.

**ethyl 4-(4-chlorophenyl)-2-methyl-4-oxobutanoate<sup>9</sup>**

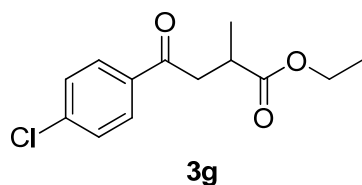

Yellow liquid, 91% yield,  $^1\text{H}$  NMR (400 MHz,  $\text{CDCl}_3$ )  $\delta$  7.96–7.88 (m, 2H), 7.47–7.40 (m, 2H), 4.14 (q,  $J = 7.2$  Hz, 2H), 3.45 (dd,  $J = 17.6, 8.0$  Hz, 1H), 3.15–3.06 (m, 1H), 2.95 (dd,  $J = 17.6, 5.2$  Hz, 1H), 1.30–1.22 (m, 6H).  $^{13}\text{C}$  NMR (100 MHz,  $\text{CDCl}_3$ )  $\delta$  196.8, 175.7, 139.5, 134.9, 129.3, 128.8, 60.5, 41.7, 34.9, 17.2, 14.0.

**ethyl 2-methyl-4-oxo-4-(4-(trifluoromethyl)phenyl)butanoate**

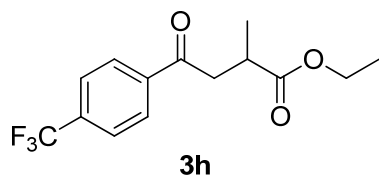

Yellow liquid, 78% yield,  $^1\text{H}$  NMR (400 MHz,  $\text{CDCl}_3$ )  $\delta$  8.07 (d,  $J = 8.2$  Hz, 2H), 7.73 (d,  $J = 8.4$  Hz, 2H), 4.15 (q,  $J = 7.2$  Hz, 2H), 3.51 (dd,  $J = 17.6, 8.0$  Hz, 1H), 3.18–3.09 (m, 1H), 2.99 (dd,  $J = 17.6, 5.2$  Hz, 1H), 1.31–1.23 (m, 6H).  $^{13}\text{C}$  NMR (100 MHz,  $\text{CDCl}_3$ )  $\delta$  197.2, 175.6, 139.3, 134.5, 134.2, 128.3, 125.6, 125.5, 124.9, 122.2, 60.6, 42.1, 35.0, 17.2, 14.2.  $^{19}\text{F}$  NMR (376 MHz,  $\text{CDCl}_3$ )  $\delta$  -63.55. HRMS-ESI ( $m/z$ ): Calculated for  $\text{C}_{14}\text{H}_{15}\text{F}_3\text{O}_3$  ( $\text{M} + \text{H}$ ) $^+$ : 289.1052, Found: 289.1064.

**ethyl 4-(4-methoxyphenyl)-2-methyl-4-oxobutanoate<sup>10</sup>**

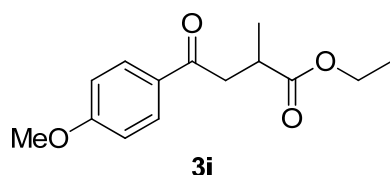

$^1\text{H}$  NMR (400 MHz,  $\text{CDCl}_3$ )  $\delta$  7.97–7.93 (m, 2H), 6.95–6.91 (m, 2H), 4.15 (q,  $J = 6.8$  Hz, 2H), 3.87 (s, 3H), 3.43 (dd,  $J = 17.2, 8.0$  Hz, 1H), 3.15–3.06 (m, 1H), 2.97 (dd,  $J = 17.2, 5.6$  Hz, 1H), 1.29–1.22 (m, 6H).  $^{13}\text{C}$  NMR (100 MHz,  $\text{CDCl}_3$ )  $\delta$  196.5, 176.0, 163.4, 130.2, 129.7, 113.6, 60.4, 55.3, 41.4, 35.0, 17.2, 14.0.

**ethyl 2-methyl-4-oxo-4-(o-tolyl)butanoate**

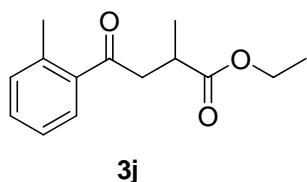

Yellow liquid, 97% yield,  $^1\text{H}$  NMR (400 MHz,  $\text{CDCl}_3$ )  $\delta$  7.68 (dd,  $J = 7.6, 1.2$  Hz, 1H), 7.36 (td,  $J = 7.2, 1.2$  Hz, 1H), 7.28–7.21 (m, 2H), 4.15 (q,  $J = 7.2$  Hz, 2H), 3.40 (dd,  $J = 17.6, 8.0$  Hz, 1H), 3.14–3.05 (m, 1H), 2.91 (dd,  $J = 17.6, 5.6$  Hz, 1H), 2.48 (s, 3H), 1.25 (t,  $J = 7.2$  Hz, 6H).  $^{13}\text{C}$  NMR (100 MHz,  $\text{CDCl}_3$ )  $\delta$  202.0, 175.8, 138.0, 137.6, 131.8, 131.2, 128.4, 125.6, 60.5, 44.7, 35.2, 21.2, 17.2, 14.1. HRMS-ESI ( $m/z$ ): Calculated for  $\text{C}_{14}\text{H}_{18}\text{O}_3$  ( $\text{M} + \text{Na}$ ) $^+$ : 257.1154, Found: 257.1155.

**ethyl 2,3-dimethyl-4-oxo-4-phenylbutanoate**<sup>8</sup>

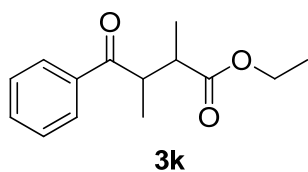

Yellow liquid, 66% yield, dr = 11:1 <sup>1</sup>H NMR (400 MHz, CDCl<sub>3</sub>) δ 8.02–7.92 (m, 2H), 7.60–7.53 (m, 1H), 7.51–7.42 (m, 2H), 4.15–3.96 (m, 2H), 3.80–3.72 (m, 1H), 3.02–2.89 (m, 1H), 1.29–1.12 (m, 9H). <sup>13</sup>C NMR (100 MHz, CDCl<sub>3</sub>) δ 203.4, 175.7, 136.0, 132.9, 128.6, 128.3, 60.5, 43.0, 41.7, 14.5, 14.1, 14.0.

**ethyl 2-(1-oxo-1,2,3,4-tetrahydronaphthalen-2-yl)propanoate**<sup>8</sup>

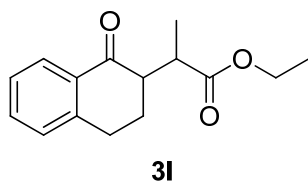

Yellow liquid, 33% yield, dr = 3:1 <sup>1</sup>H NMR (400 MHz, CDCl<sub>3</sub>) for major δ 8.02 (dd, *J* = 8.0, 1.2 Hz, 1H), 7.47 (td, *J* = 11.2, 1.2 Hz, 1H), 7.30 (t, *J* = 7.6 Hz, 1H), 7.24 (d, *J* = 7.6 Hz, 1H), 4.23–4.16 (m, 2H), 3.22–2.98 (m, 4H), 2.21–2.15 (m, 1H), 1.99–1.88 (m, 1H), 1.29 (t, *J* = 7.2 Hz, 3H), 1.17 (d, *J* = 7.2 Hz, 3H). <sup>13</sup>C NMR (100 MHz, CDCl<sub>3</sub>) δ 198.0, 176.0, 143.9, 133.3, 132.3, 128.6, 127.4, 126.6, 60.5, 50.2, 38.7, 29.4, 25.2, 14.2, 13.1.

**methyl 2-methyl-4-oxo-4-phenylbutanoate**<sup>11</sup>

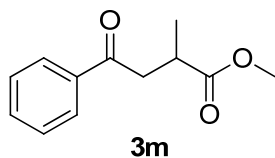

Yellow liquid, 90% yield, <sup>1</sup>H NMR (400 MHz, CDCl<sub>3</sub>) δ 7.98–7.95 (m, 2H), 7.59–7.53 (m, 1H), 7.51–7.41 (m, 2H), 3.70 (s, 3H), 3.51–3.44 (m, 1H), 3.14 (qd, *J* = 7.2, 1.6 Hz, 1H), 3.02 (dd, *J* = 17.6, 5.6 Hz, 1H), 1.29–1.27 (m, 3H). <sup>13</sup>C NMR (100 MHz, CDCl<sub>3</sub>) δ 197.9, 176.3, 136.5, 133.0, 128.5, 127.9, 51.8, 41.9, 34.8, 17.2.

**isopropyl 2,2-dimethyl-4-oxo-4-phenylbutanoate**

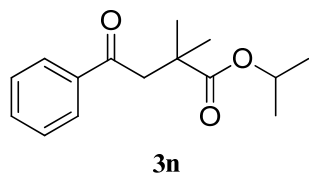

Yellow liquid, 78% yield,  $^1\text{H}$  NMR (400 MHz,  $\text{CDCl}_3$ )  $\delta$  8.03–8.00 (m, 2H), 7.60–7.55 (m, 1H), 7.51–7.45 (m, 2H), 4.36–4.28 (m, 1H), 4.13–4.04 (m, 4H), 2.83 (dd,  $J = 16.4, 7.2$  Hz, 2H), 2.51 (dd,  $J = 16.4, 6.8$  Hz, 2H), 1.19 (t,  $J = 7.2$  Hz, 6H).  $^{13}\text{C}$  NMR (100 MHz,  $\text{CDCl}_3$ )  $\delta$  201.0, 171.4, 135.8, 133.2, 128.7, 128.5, 60.8, 38.7, 36.0, 29.7, 14.0. HRMS-ESI ( $m/z$ ): Calculated for  $\text{C}_{15}\text{H}_{20}\text{O}_3$  ( $M + \text{H}$ ) $^+$ : 249.1491, Found: 249.1482.

**ethyl 2,2-dimethyl-4-oxo-4-phenylbutanoate**<sup>12</sup>

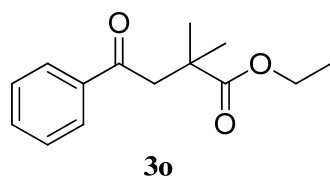

Yellow liquid, 62% yield,  $^1\text{H}$  NMR (400 MHz,  $\text{CDCl}_3$ )  $\delta$  7.95–7.92 (m, 2H), 7.57–7.53 (m, 1H), 7.47–7.43 (m, 2H), 4.13 (q,  $J = 7.2$  Hz, 2H), 3.28 (s, 2H), 1.32 (s, 6H), 1.20 (t,  $J = 6.8$  Hz, 3H).  $^{13}\text{C}$  NMR (100 MHz,  $\text{CDCl}_3$ )  $\delta$  197.6, 177.2, 137.0, 132.9, 128.5, 127.8, 60.4, 48.4, 40.0, 29.6, 25.7, 14.0.

**ethyl 4-oxo-4-phenylbutanoate**<sup>13</sup>

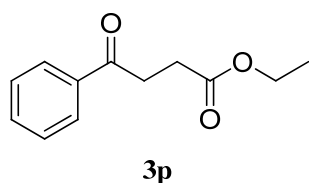

Yellow liquid, 66% yield,  $^1\text{H}$  NMR (400 MHz,  $\text{CDCl}_3$ )  $\delta$  8.01–7.92 (m, 2H), 7.59–7.52 (m, 1H), 7.50–7.42 (m, 2H), 4.16 (q,  $J = 7.2$  Hz, 2H), 3.31 (t,  $J = 6.4$  Hz, 2H), 2.75 (t,  $J = 6.4$  Hz, 2H), 1.26 (t,  $J = 7.2$  Hz, 3H).  $^{13}\text{C}$  NMR (100 MHz,  $\text{CDCl}_3$ )  $\delta$  198.0, 172.7, 136.5, 128.5, 127.9, 60.5, 33.3, 28.2, 14.0.

**cinnamyl 2-methyl-4-oxo-4-phenylbutanoate**

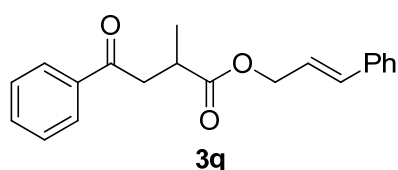

Yellow liquid, 68% yield,  $^1\text{H}$  NMR (400 MHz,  $\text{CDCl}_3$ )  $\delta$  7.98–7.96 (m, 2H), 7.58–7.24 (m, 9H), 6.65 (d,  $J = 16.0$  Hz, 1H), 6.27 (dt,  $J = 15.6, 6.4$  Hz, 1H), 4.76 (dt,  $J = 6.4$  Hz, 1.6, 2H), 3.51 (dd,  $J = 17.6, 8.0$  Hz, 1H), 3.22–3.16 (m, 1H), 3.05 (dd,  $J = 17.6, 5.6$  Hz, 1H), 1.32 (d,  $J = 7.2$  Hz, 3H).  $^{13}\text{C}$  NMR (100 MHz,  $\text{CDCl}_3$ )  $\delta$  197.9, 175.6, 136.5, 136.2, 133.8, 133.1, 128.5, 128.5, 127.9, 127.9, 126.5, 123.1, 65.1, 41.8, 35.0, 17.3. HRMS-ESI ( $m/z$ ): Calculated for  $\text{C}_{20}\text{H}_{20}\text{O}_3$  ( $M + \text{H}$ ) $^+$ : 309.1491, Found: 309.1481.

#### allyl 4-oxo-2,4-diphenylbutanoate<sup>14</sup>

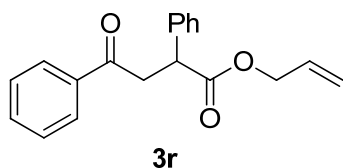

Yellow liquid, 77% yield,  $^1\text{H}$  NMR (400 MHz,  $\text{CDCl}_3$ )  $\delta$  7.98 (m, 2H), 7.60–7.26 (m, 8H), 5.92–5.78 (m, 1H), 5.24–5.14 (m, 2H), 4.67–4.55 (m, 2H), 4.33 (dd,  $J = 10.4, 4.4$  Hz, 1H), 3.96 (dd,  $J = 18.0, 10.4$  Hz, 1H), 3.29 (dd,  $J = 18.0, 4.0$  Hz, 1H).  $^{13}\text{C}$  NMR (100 MHz,  $\text{CDCl}_3$ )  $\delta$  197.5, 173.0, 138.2, 136.3, 133.3, 131.9, 128.8, 128.5, 128.0, 127.8, 127.5, 117.8, 65.5, 46.4, 42.7.

## 6. Reference

- 1 W. J. Zhao, M. Yan, D. Huang and S. J. Ji, *Tetrahedron*, 2005, **61**, 5585.
- 2 J. Paleček, O. Paleta, *Synthesis*, 2004, **4**, 521.
- 3 K. Blau, L. Burgemeister, J. Grasnack, V. Voerckel, *Journal für Praktische Chemie (Leipzig)*, 1991, **333**, 455.
- 4 F. Ando, K. Ohashi, J. Koketsu, *Bull. Chem. Soc. Jpn.*, 1976, **49**, 727.
- 5 M. K. Meilahn, B. Cox, M. E. Munk, *J. Org. Chem.*, 1975, **40**, 819.
- 6 R. F. Parcell, F. P. Hauck Jr, *J. Org. Chem.*, 1963, **28**, 3468.
- 7 J. Ishihara, Y. Watanabe, N. Koyama, Y. Nishino, K. Takahashi, S. Hatakeyama, *Tetrahedron*, 2011, **67**, 3659.
- 7 N. Fujisawa, A. Hosomi, K. Miura, H. Saito, D. Wang, *Org. Lett.*, 2001, **3**, 2591.
- 8 C. G. Daniliuc, F. Glorius, N. E. Wurcz, *Chem. Eur. J.*, 2012, **18**, 16297.

- 9 T. Fujimura, S. Aoki, E. Nakamura, *J. Org. Chem.*, 1991, **56**, 2809.
- 10 E. A. Jo, C. H. Jun, *Eur. J. Org. Chem.*, 2006, **11**, 2504.
- 11 S. A. Barnett, Y. D. Cai, B. P. Roberts, D. A. Tocher, *Org. Biomol. Chem.*, 2004, **2**, 2517.
- 12 L. H. P. Meijer, U. K. Pandit, *Tetrahedron*, 1985, **41**, 467.
- 13 G. N. Gururaja, I. N. N. Namboothiri, S. M. Mobin, *Eur. J. Org. Chem.*, 2011, **11**, 2048.

### 7. The NOE experiment of N-(1-phenylprop-1-en-1-yl)piperidine (**11**)

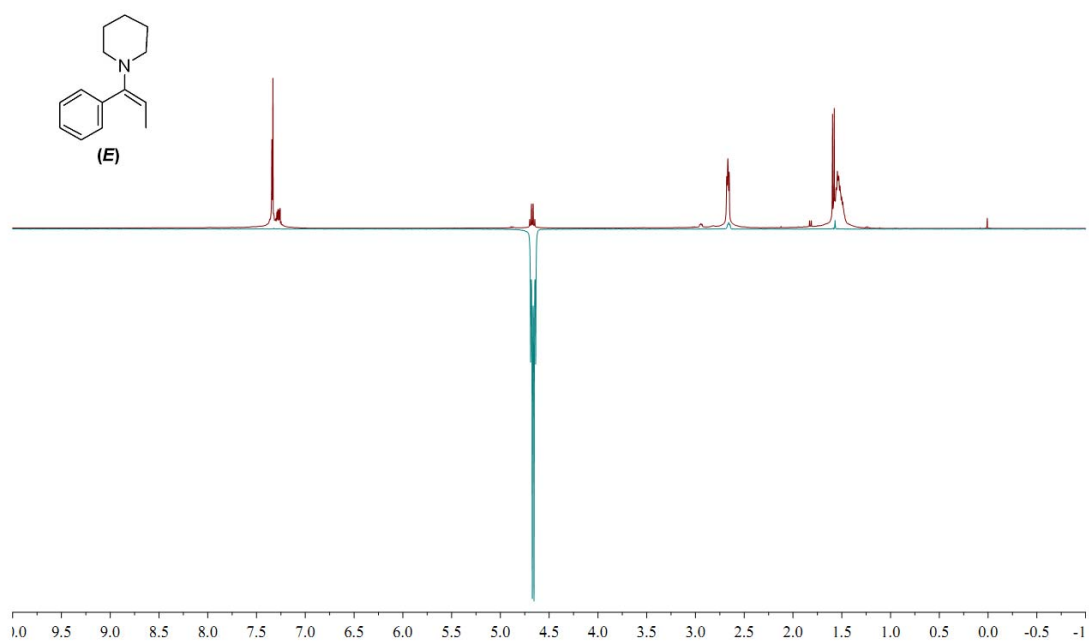

## 8. NMR spectra of the products

### N-(1-phenylvinyl)morpholine (1a)

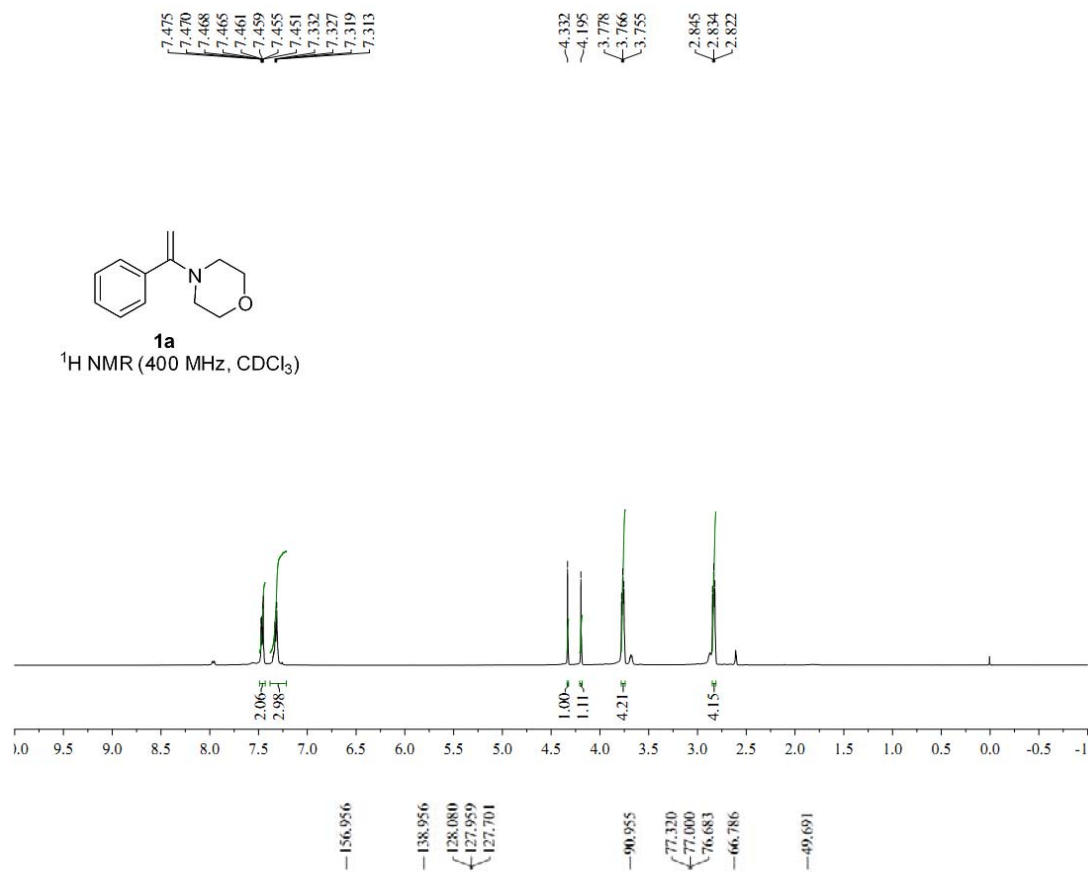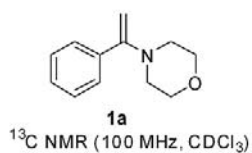

### N-(1-phenylvinyl)piperidine (1b)



7.478  
7.473  
7.458  
7.454  
7.332  
7.318  
7.313  
7.303  
7.299  
7.294  
7.284

4.244  
4.147

2.816  
2.803  
2.789  
1.645  
1.631  
1.618  
1.605  
1.591  
1.566  
1.558  
1.545  
1.532  
1.526

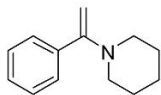

**1b**  
 $^1\text{H NMR}$  (400 MHz,  $\text{CDCl}_3$ )

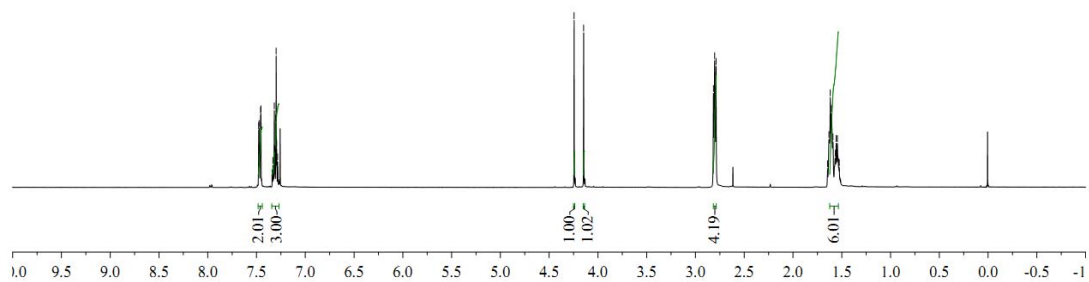

158.037  
140.289  
128.003  
127.727  
127.661

90.095  
77.318  
77.000  
76.682

50.459

25.969  
24.499

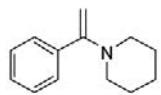

**1b**  
 $^{13}\text{C NMR}$  (100 MHz,  $\text{CDCl}_3$ )

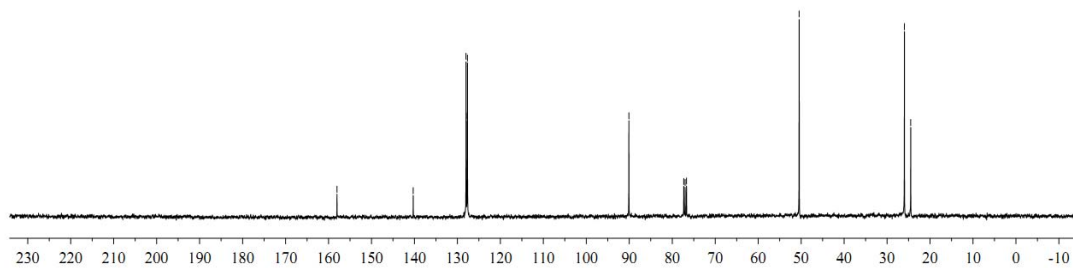

# N-(1-phenylvinyl)pyrrolidine (1c)

7.433  
7.428  
7.415  
7.413  
7.409  
7.359  
7.352  
7.338  
7.336  
7.333  
7.323  
7.322  
7.317  
7.312

3.889  
3.853  
3.038  
3.027  
3.021  
3.015  
3.005  
1.914  
1.907  
1.905  
1.898  
1.890  
1.889  
1.881

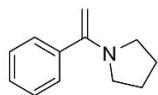

**1c**

<sup>1</sup>H NMR (400 MHz, CDCl<sub>3</sub>)

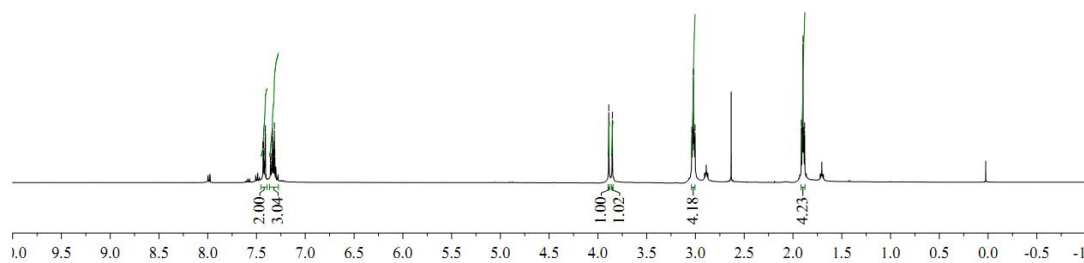

154.335

140.506

127.744

127.697

127.386

84.221

77.319

77.000

76.683

49.114

24.931

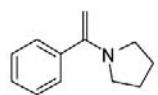

**1c**

<sup>13</sup>C NMR (100 MHz, CDCl<sub>3</sub>)

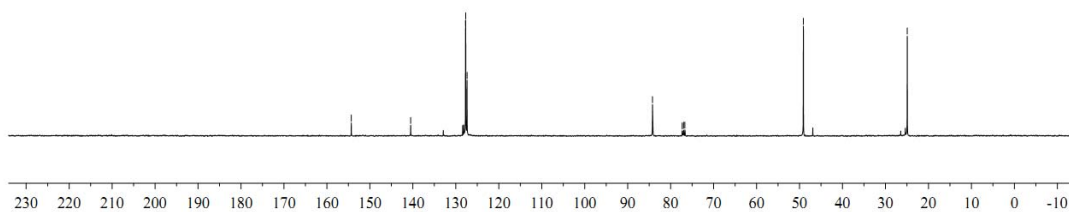

### N,N-diethyl-1-phenylethanamine (1d)

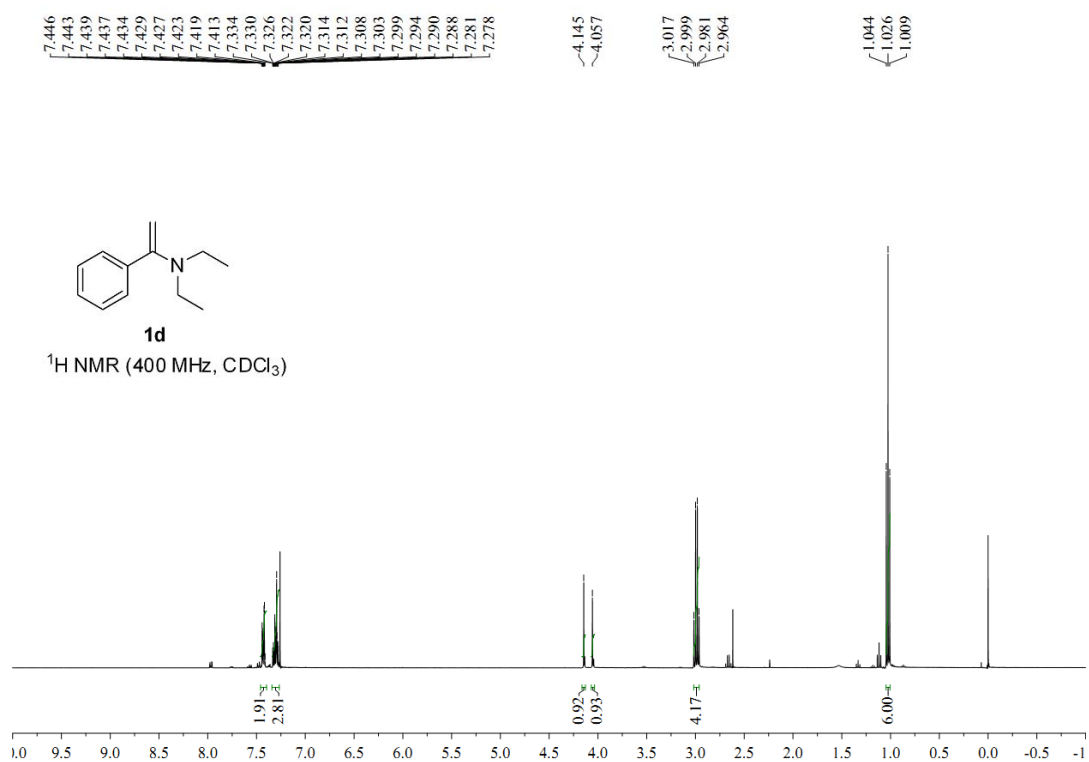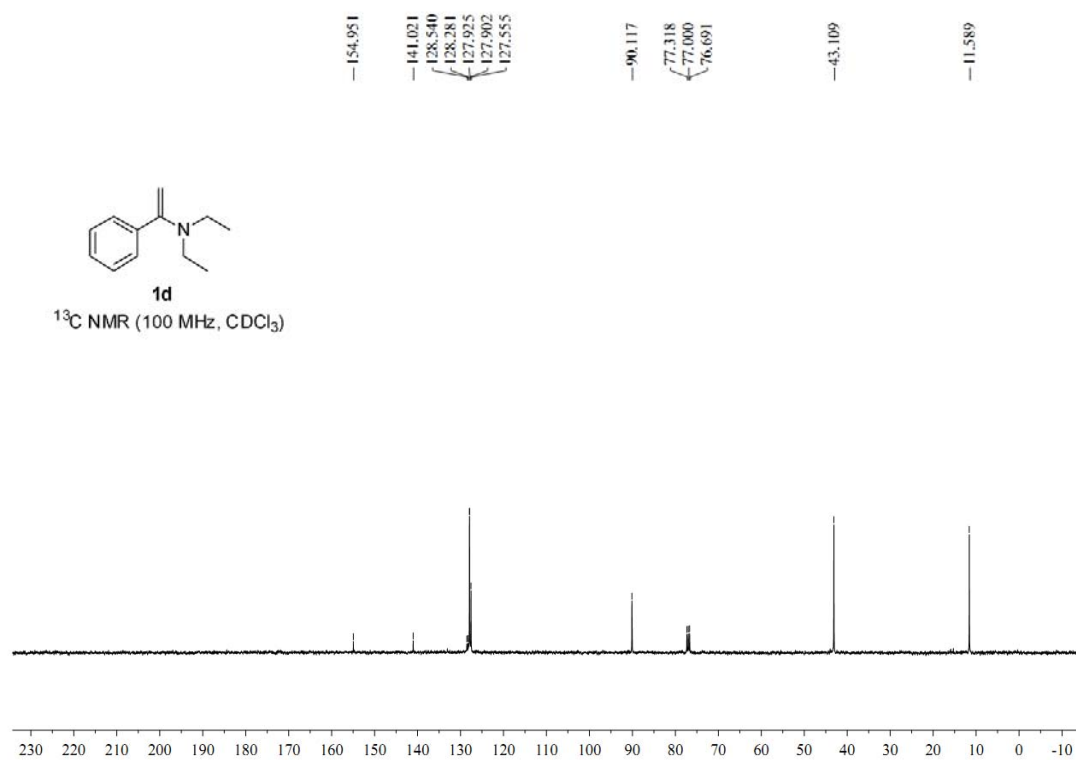

# N-(1-(p-tolyl)vinyl)piperidine (1e)

7.369  
7.364  
7.360  
7.349  
7.344  
7.137  
7.136  
7.116  
4.211  
4.103  
2.808  
2.796  
2.782  
2.352  
1.635  
1.608  
1.596  
1.581

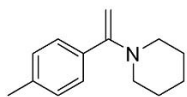

**1e**

<sup>1</sup>H NMR (400 MHz, CDCl<sub>3</sub>)

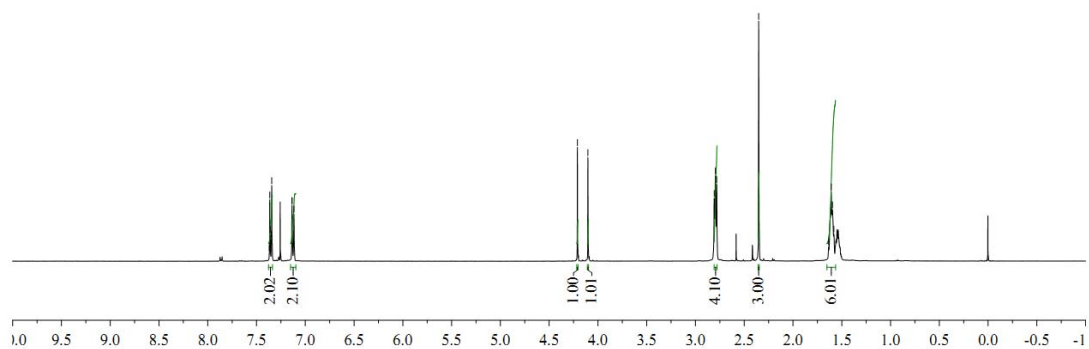

157.977  
137.457  
137.407  
128.710  
127.561  
89.453  
77.317  
77.000  
76.683  
50.458  
25.979  
24.523  
21.141

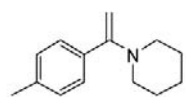

**1e**

<sup>13</sup>C NMR (100 MHz, CDCl<sub>3</sub>)

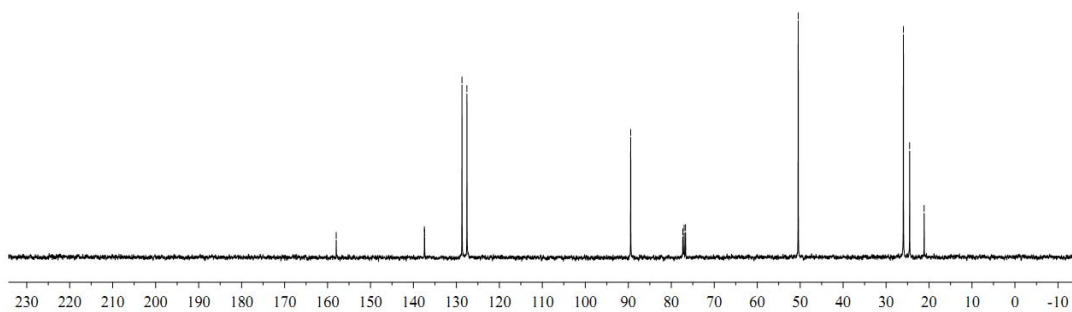

# N-(1-(4-fluorophenyl)vinyl)piperidine (1f)

7.455, 7.447, 7.442, 7.433, 7.425, 7.417, 7.411, 7.404, 7.027, 7.020, 7.014, 7.003, 6.998, 6.993, 6.981, 6.976, 6.969, 4.199, 4.128, 2.790, 2.778, 2.764, 1.635, 1.608, 1.595, 1.581, 1.570, 1.565, 1.562, 1.553, 1.541, 1.522

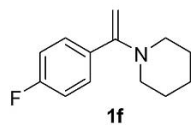

<sup>1</sup>H NMR (400 MHz, CDCl<sub>3</sub>)

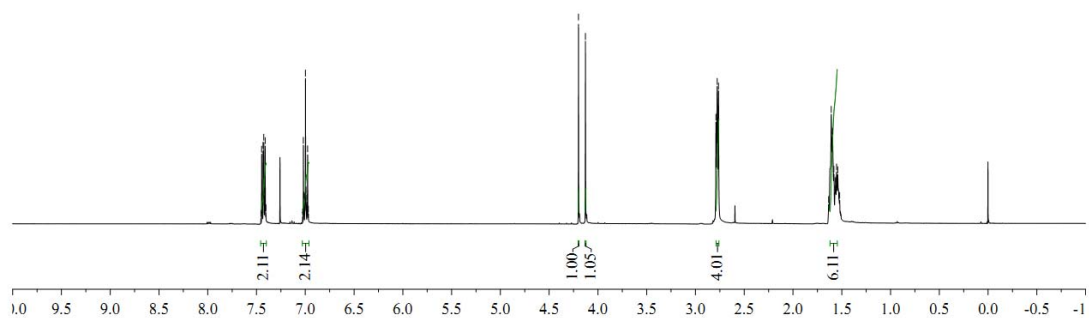

163.742, 161.297, 157.002, 136.233, 129.179, 129.101, 114.933, 114.721, 90.275, 77.316, 77.000, 76.684, 50.473, 25.959, 24.455

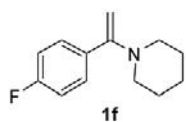

<sup>13</sup>C NMR (100 MHz, CDCl<sub>3</sub>)

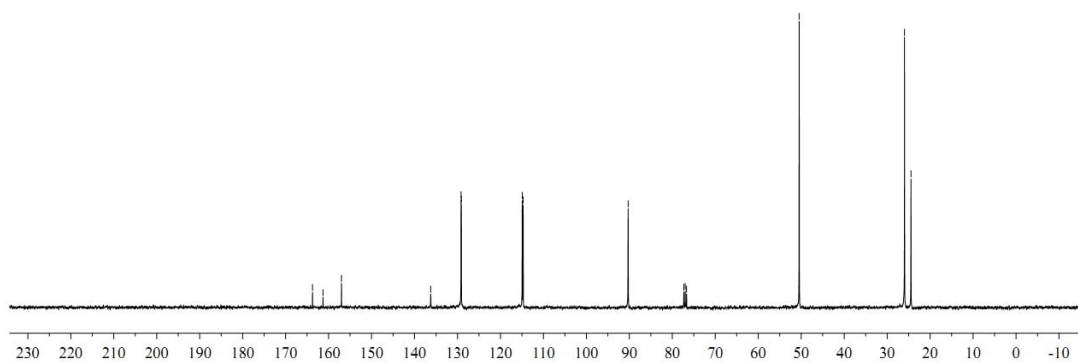

-115.228

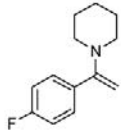

**1f**

$^{19}\text{F}$  NMR (376 MHz,  $\text{CDCl}_3$ )

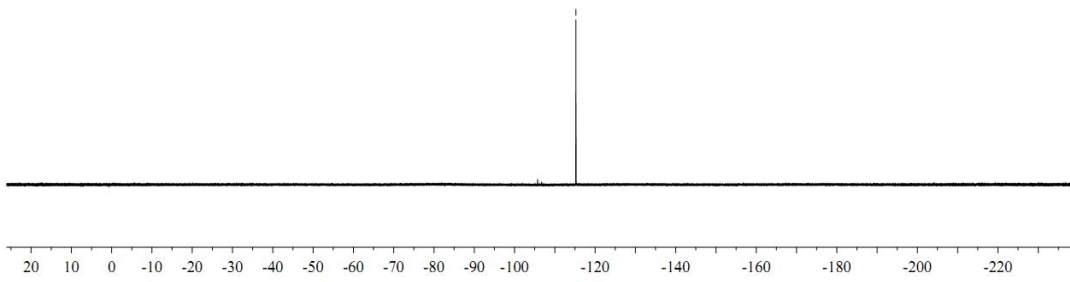

# N-(1-(4-chlorophenyl)vinyl)piperidine (1g)

7.435, 7.429, 7.424, 7.412, 7.407, 7.401, 7.319, 7.313, 7.308, 7.296, 7.291, 7.285, 7.281, 4.252, 4.173, 2.806, 2.793, 2.779, 1.655, 1.641, 1.627, 1.614, 1.601, 1.581, 1.573

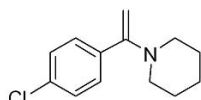

**1g**

<sup>1</sup>H NMR (400 MHz, CDCl<sub>3</sub>)

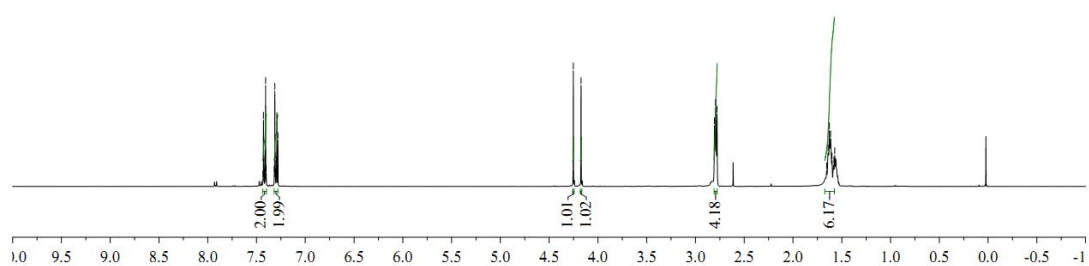

156.896, 138.750, 133.416, 128.897, 128.198, 90.767, 77.316, 77.000, 76.682, 50.496, 25.937, 24.418

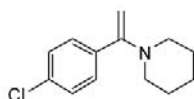

**1g**

<sup>13</sup>C NMR (100 MHz, CDCl<sub>3</sub>)

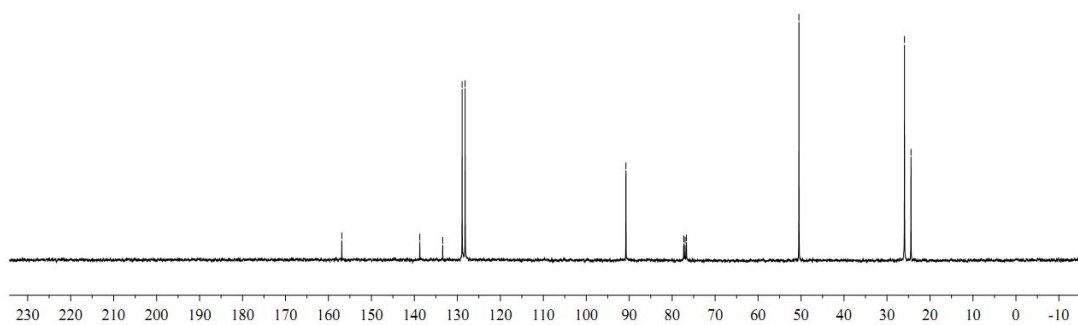

# N-(1-(4-(trifluoromethyl)phenyl)vinyl)piperidine (1h)

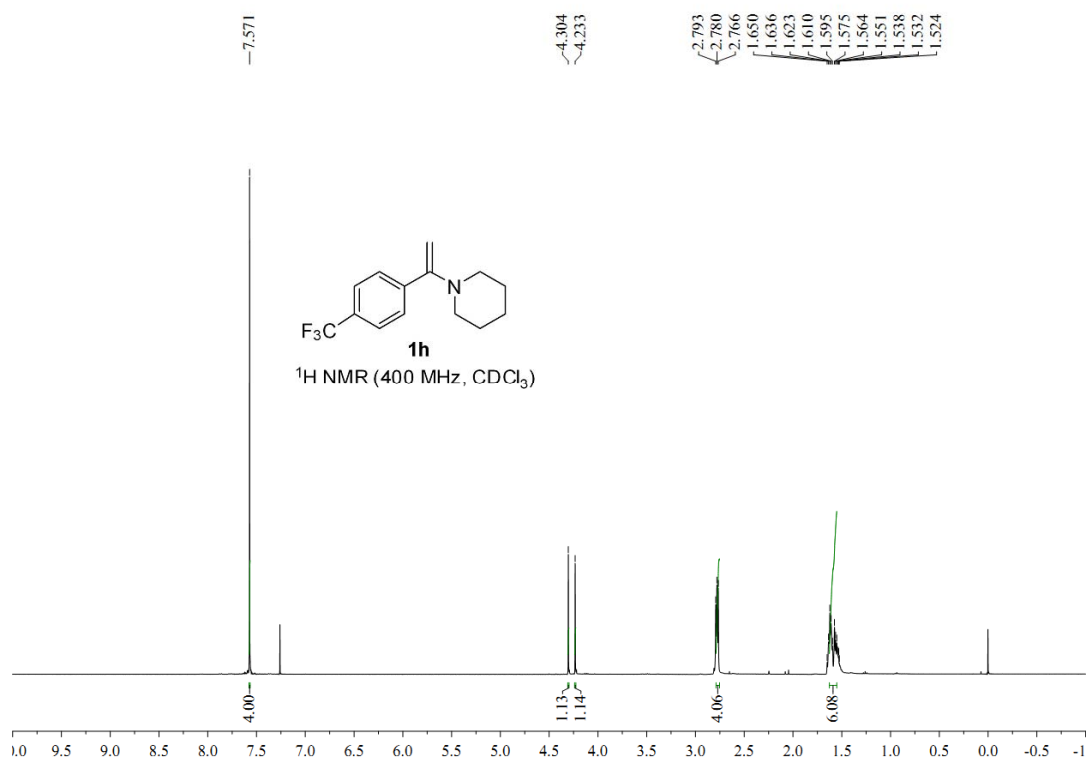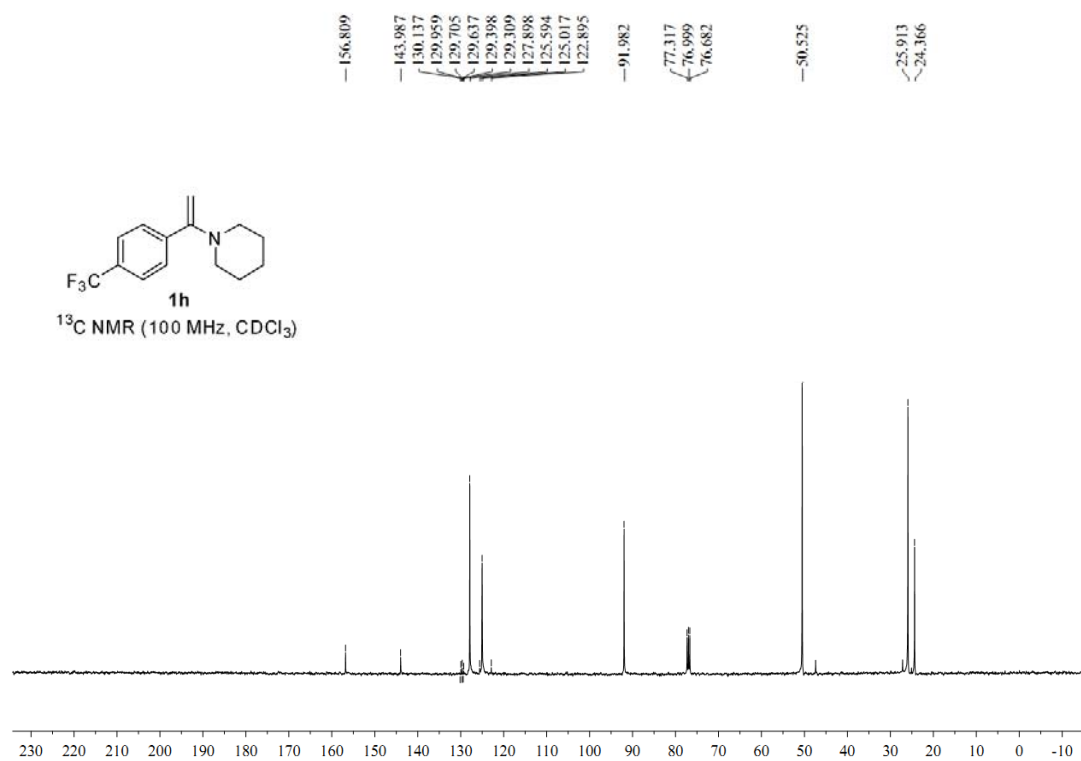



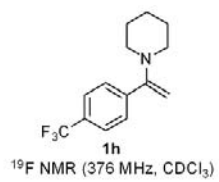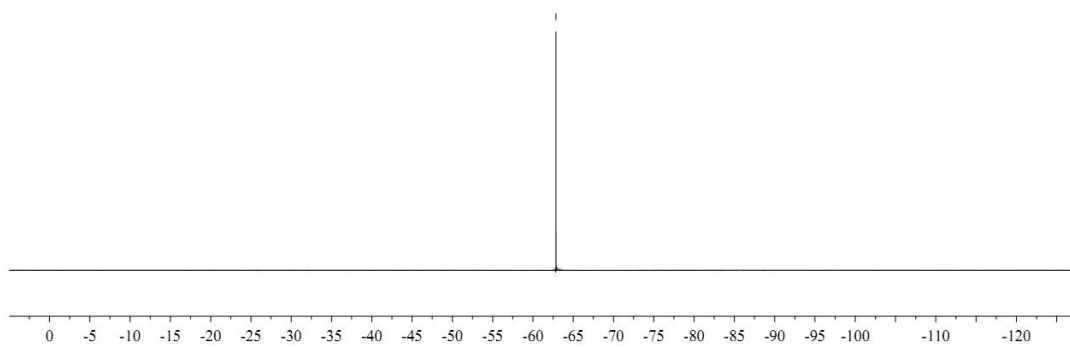

# N-(1-(4-methoxyphenyl)vinyl)piperidine (1i)

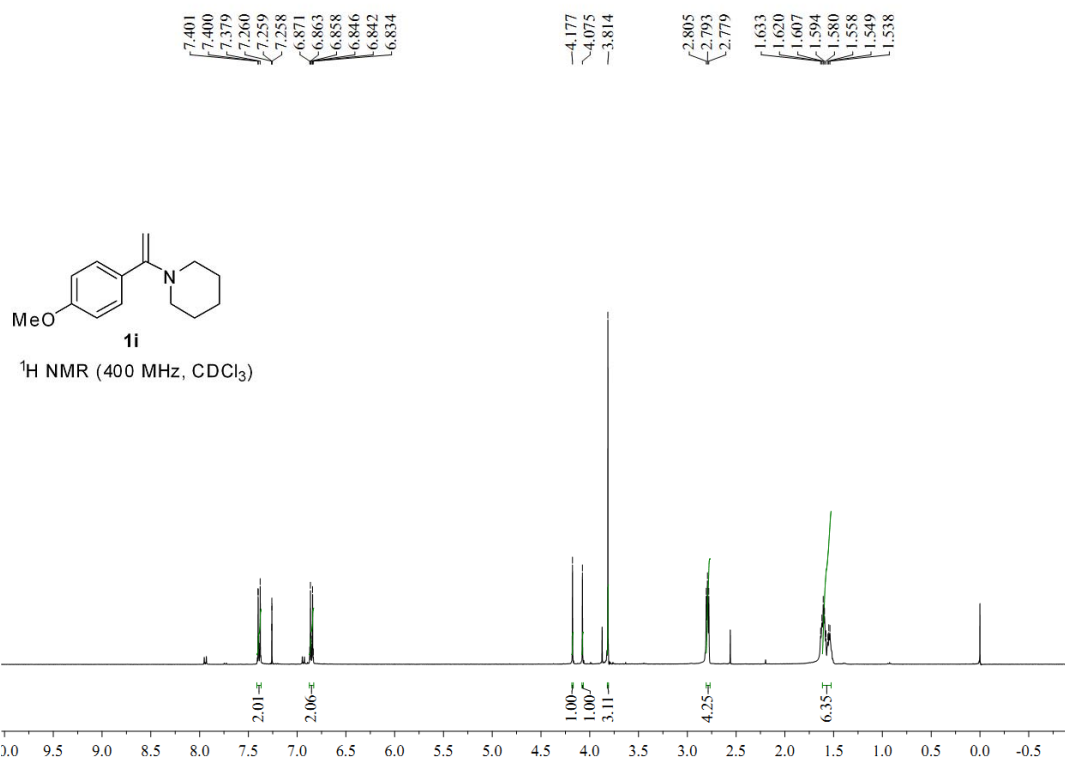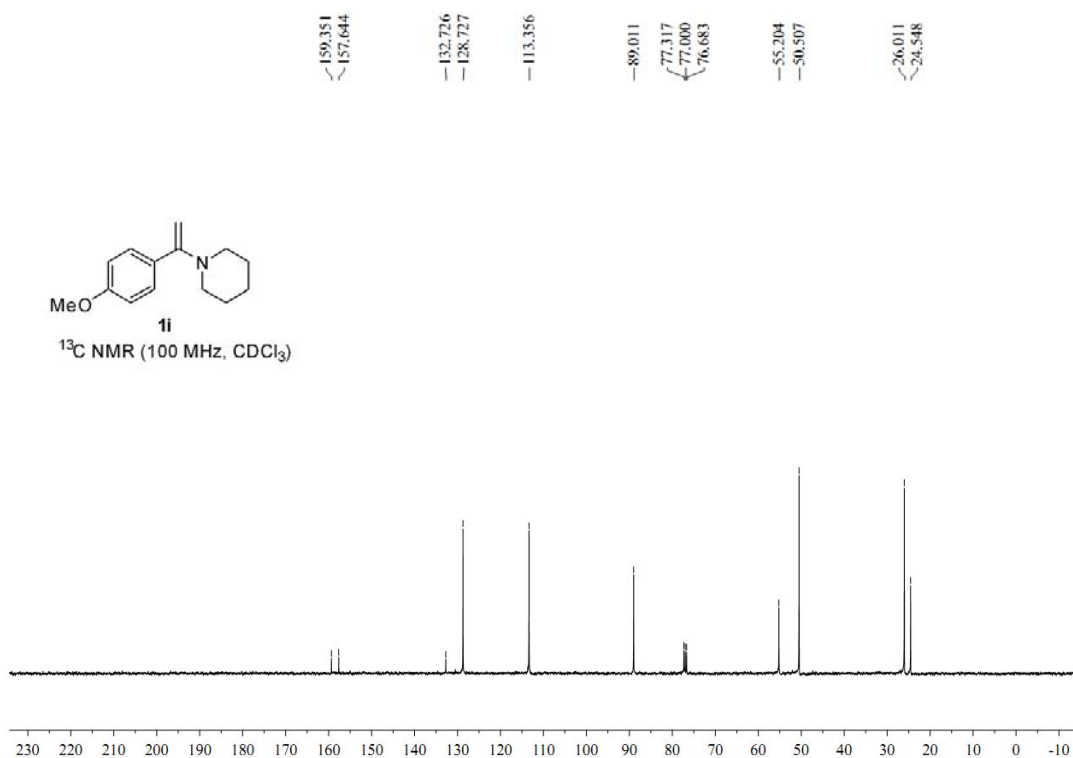

# N-(1-(o-tolyl)vinyl)piperidine (1j)

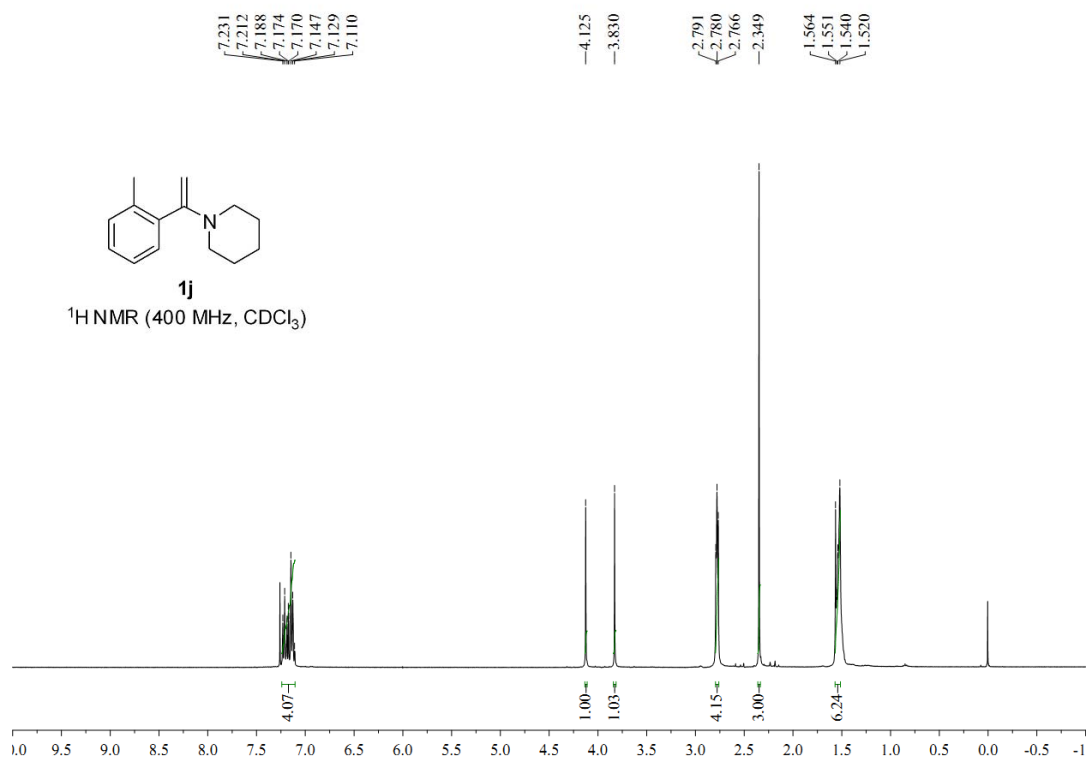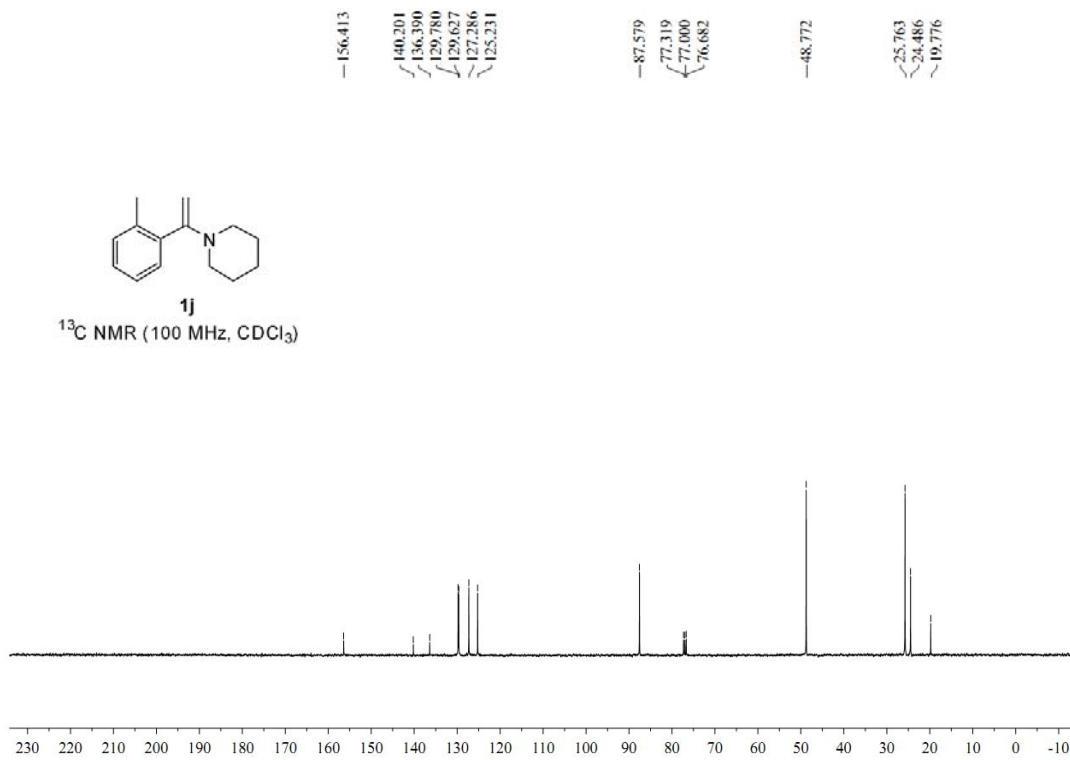

### N-(1-phenylprop-1-en-1-yl)piperidine (1k)

7.343, 7.338, 7.332, 7.325, 7.291, 7.280, 7.269, 7.259, 4.699, 4.682, 4.664, 4.647, 2.680, 2.668, 2.655, 1.594, 1.577, 1.572, 1.557, 1.545, 1.532, 1.519, 1.502, 1.491

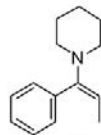

1k

<sup>1</sup>H NMR (400 MHz, CDCl<sub>3</sub>)

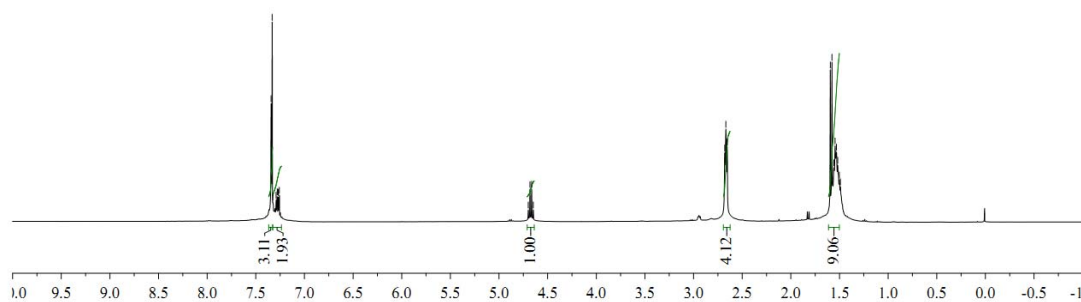

151.114, 138.629, 129.733, 127.778, 127.060, 99.089, 77.319, 77.000, 76.684, 50.641, 26.207, 24.633, 13.941

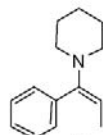

1k

<sup>13</sup>C NMR (100 MHz, CDCl<sub>3</sub>)

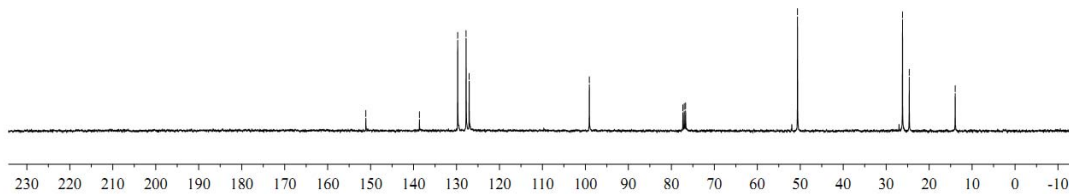

# N-(3,4-dihydronaphthalen-1-yl)piperidine (11)

7.450  
7.432  
7.222  
7.214  
7.211  
7.200  
7.196  
7.193  
7.181  
7.172  
7.139  
7.136  
7.128  
7.127  
7.124

2.763  
2.686  
2.668  
2.648  
2.233  
2.225  
1.727  
1.712  
1.698  
1.685  
1.672  
1.570

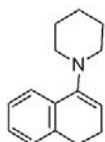

**11**

<sup>1</sup>H NMR (400 MHz, CDCl<sub>3</sub>)

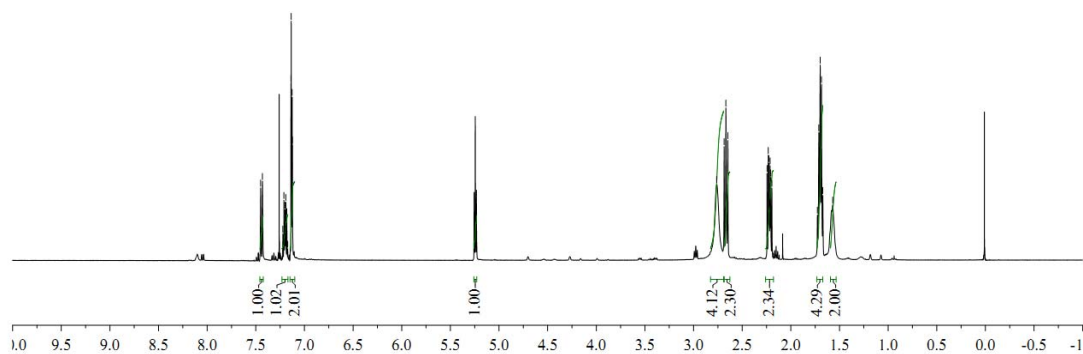

148.641  
138.034  
132.850  
127.374  
126.461  
125.987  
123.430

106.745

77.318  
77.000  
76.682

52.021

28.669  
26.294  
24.672  
22.517

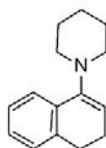

**11**

<sup>13</sup>C NMR (100 MHz, CDCl<sub>3</sub>)

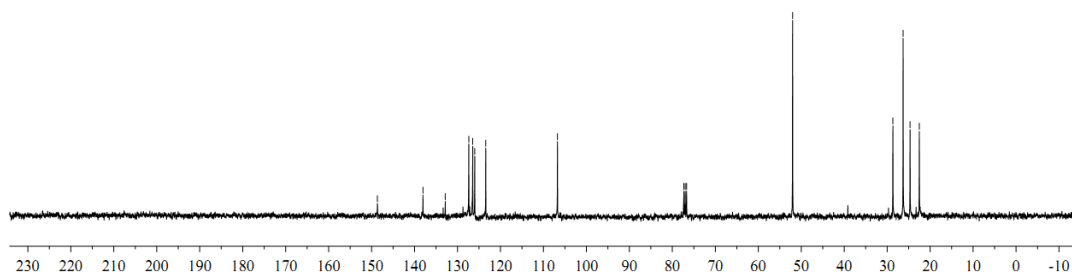

allyl 2-bromo-2-phenylacetate (**2r**)

7.566  
7.560  
7.555  
7.551  
7.546  
7.542  
7.383  
7.379  
7.372  
7.370  
7.366  
7.361  
7.357  
7.352  
7.343  
7.338  
5.934  
5.908  
5.905  
5.891  
5.865  
5.376  
5.266  
4.689  
4.686  
4.682  
4.680  
4.676  
4.672  
4.668  
4.666  
4.662  
4.659

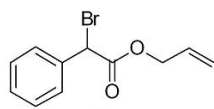

**2r**

<sup>1</sup>H NMR (400 MHz, CDCl<sub>3</sub>)

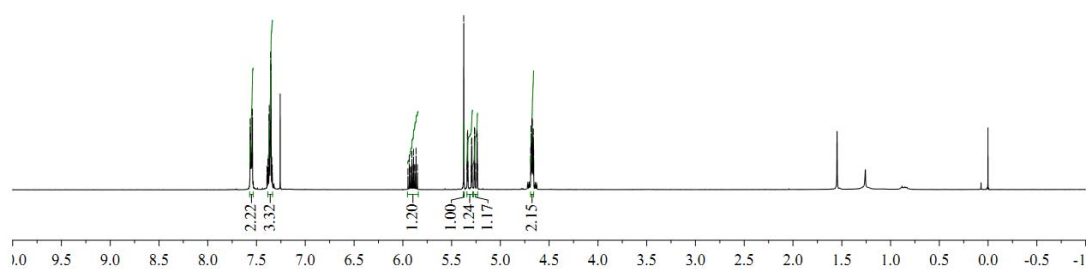

167.844

135.568

131.008

129.200

128.715

128.574

118.896

77.318

77.000

76.682

66.690

46.529

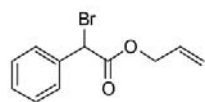

**2r**

<sup>13</sup>C NMR (100 MHz, CDCl<sub>3</sub>)

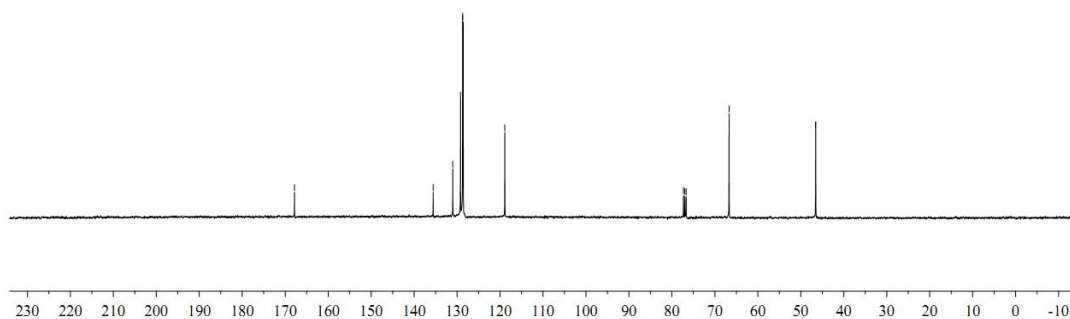

### cinnamyl 2-bromopropanoate (2q)

7.419  
7.415  
7.410  
7.397  
7.358  
7.355  
7.350  
7.337  
7.333  
7.318  
7.297  
7.294  
7.290  
7.282  
7.276  
7.258  
7.258  
6.688  
6.330  
6.314  
6.298  
6.291  
6.275  
6.258  
4.839  
4.837  
4.824  
4.823  
4.444  
4.427  
4.409  
4.392

1.866  
1.848

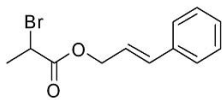

**2q**

<sup>1</sup>H NMR (400 MHz, CDCl<sub>3</sub>)

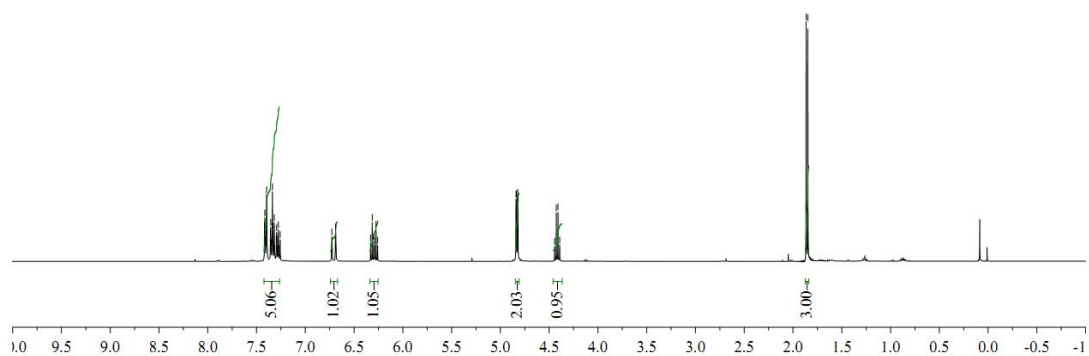

169.853

135.890  
134.759  
128.519  
128.121  
126.571  
122.069

77.318  
77.000  
76.682  
66.294

39.965

21.564

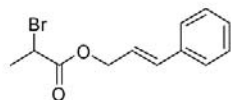

**2q**

<sup>13</sup>C NMR (100 MHz, CDCl<sub>3</sub>)

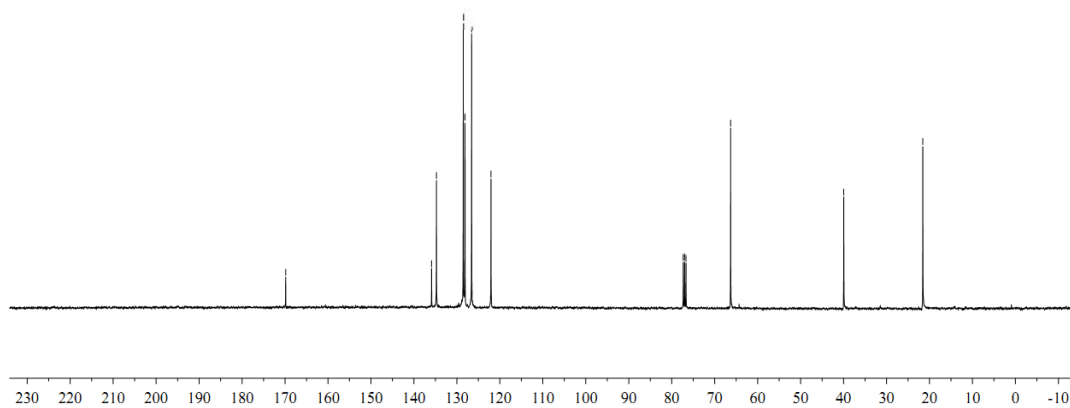

ethyl 2-methyl-4-oxo-4-phenylbutanoate (3b)

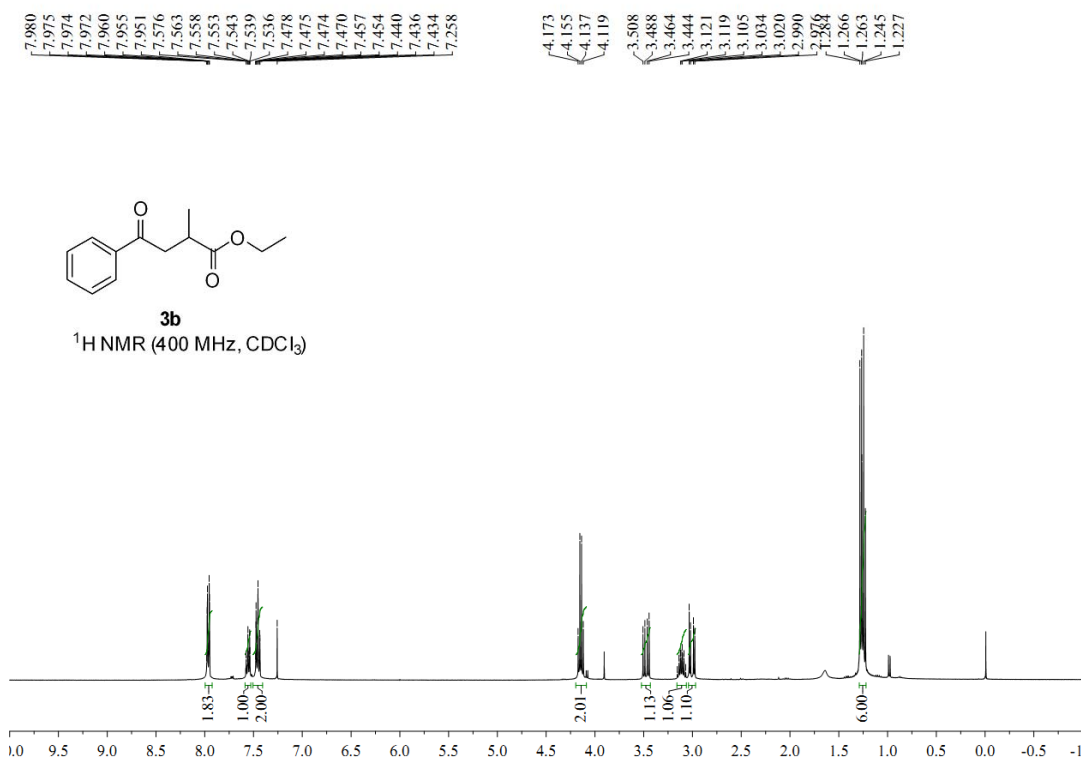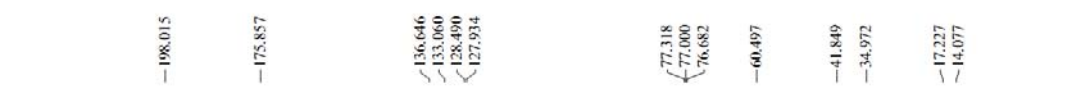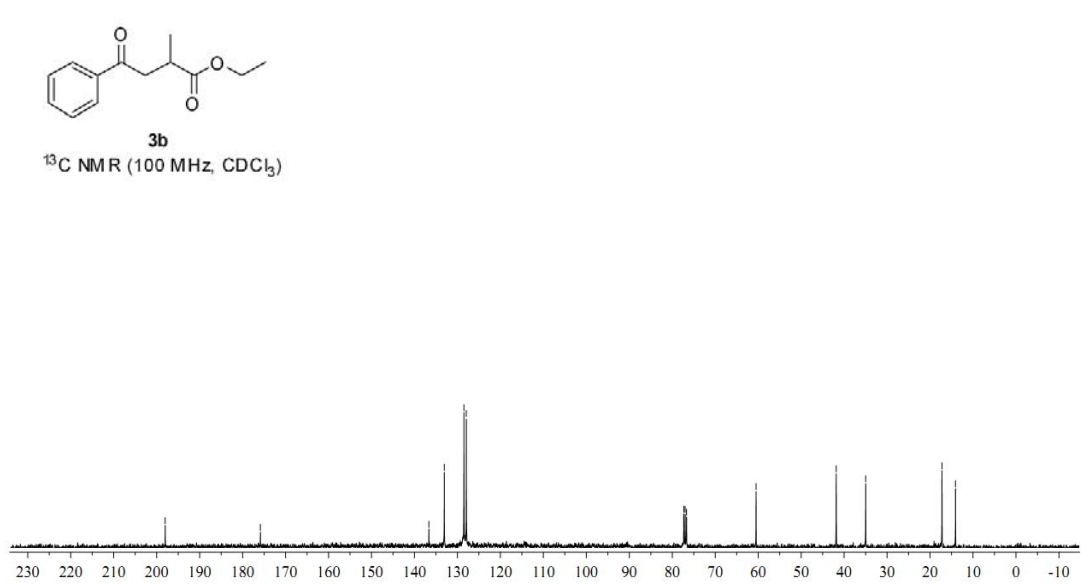



ethyl 2-methyl-4-oxo-4-(p-tolyl)butanoate (3e)

7.872  
7.868  
7.856  
7.851  
7.258  
7.239

4.171  
4.153  
4.135  
4.117

3.452  
3.428  
3.409  
3.010  
2.996  
2.969

1.274  
1.262  
1.256  
1.244  
1.226

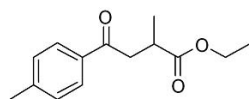

3e

<sup>1</sup>H NMR (400 MHz, CDCl<sub>3</sub>)

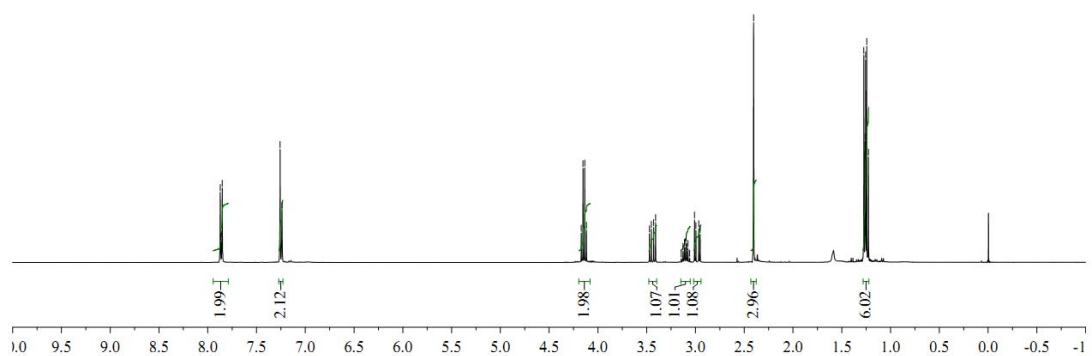

197.440

175.739

143.666

134.119

129.028

127.927

77.315

77.000

76.646

60.289

41.604

34.885

21.376

17.083

13.950

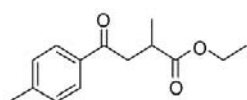

3e

<sup>13</sup>C NMR (100 MHz, CDCl<sub>3</sub>)

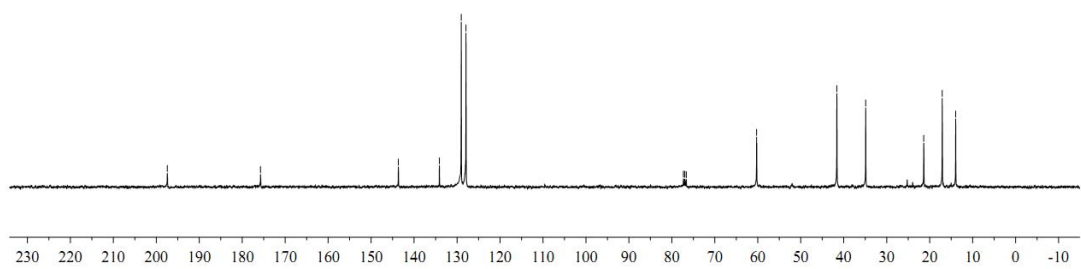

**ethyl 4-(4-fluorophenyl)-2-methyl-4-oxobutanoate (3f)**

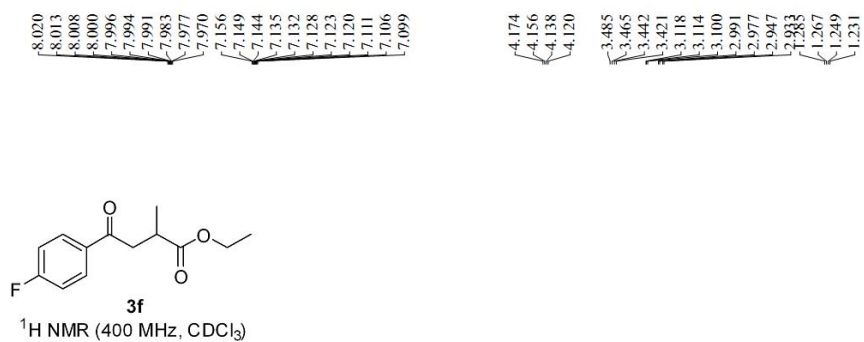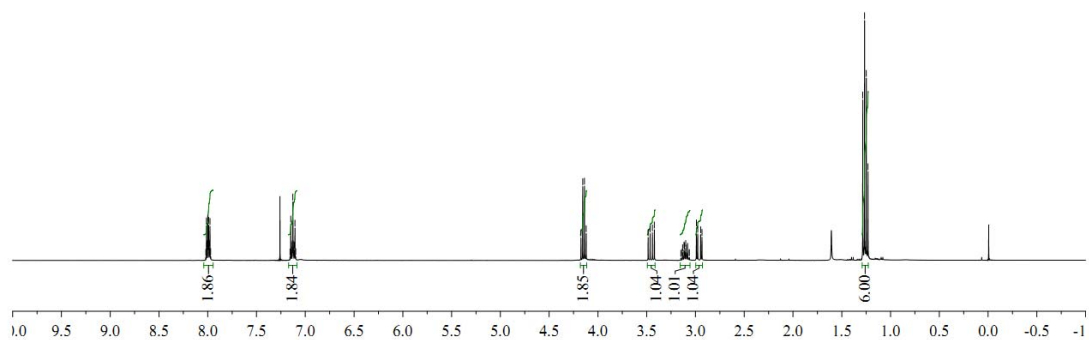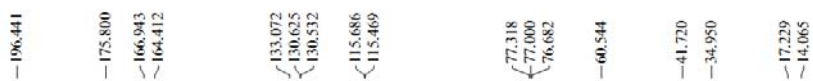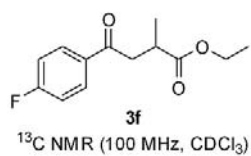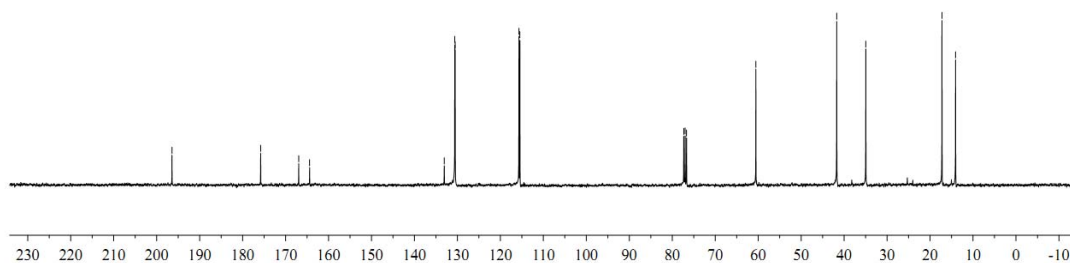

--105.571

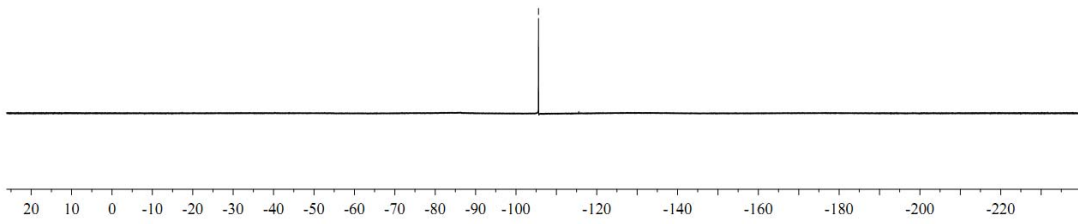

ethyl 4-(4-chlorophenyl)-2-methyl-4-oxobutanoate (**3g**)

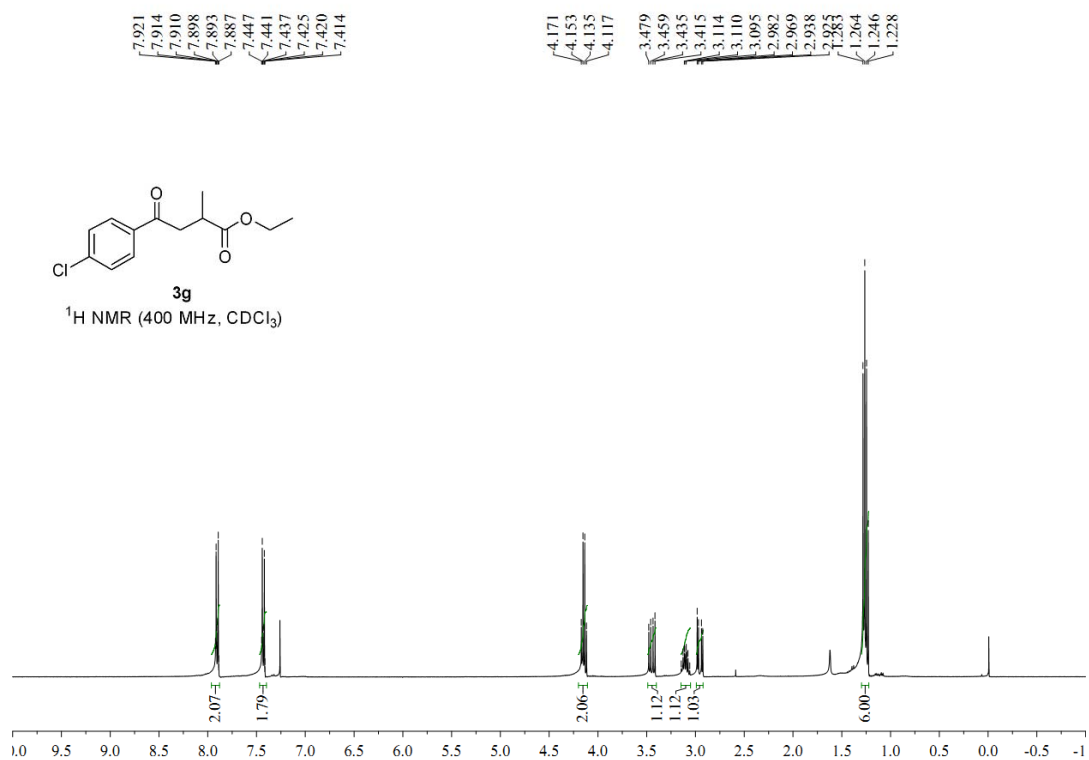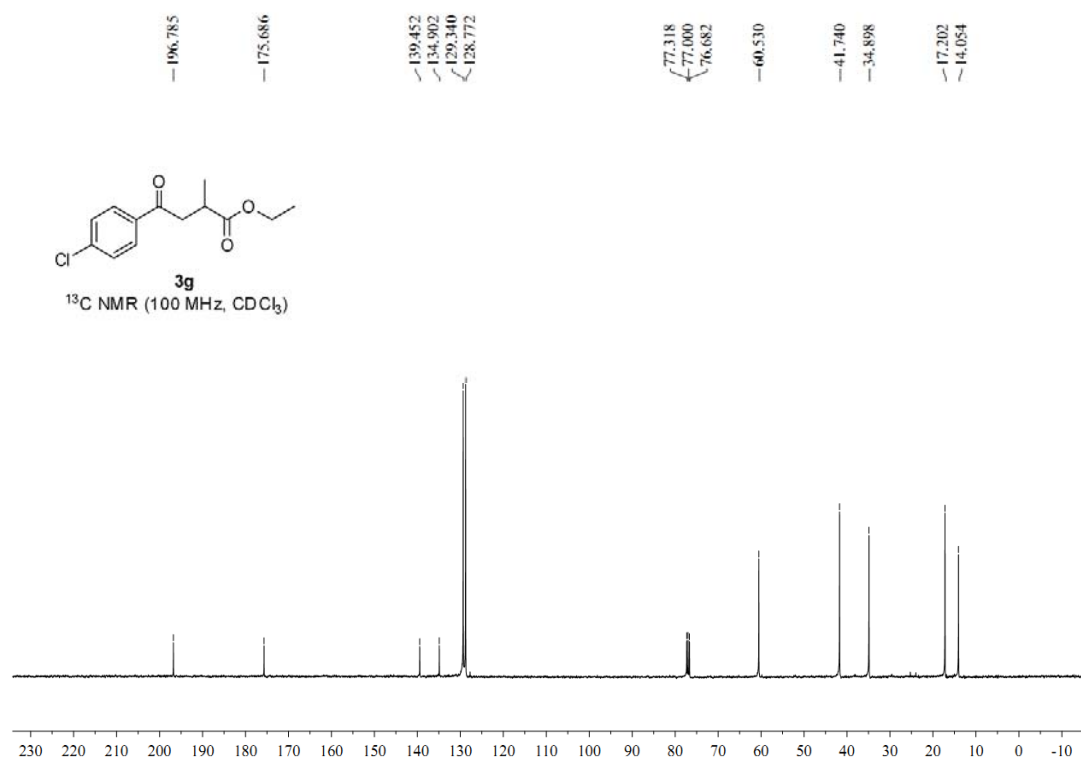

ethyl 2-methyl-4-oxo-4-(4-(trifluoromethyl)phenyl)butanoate (3h)

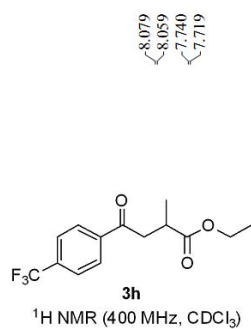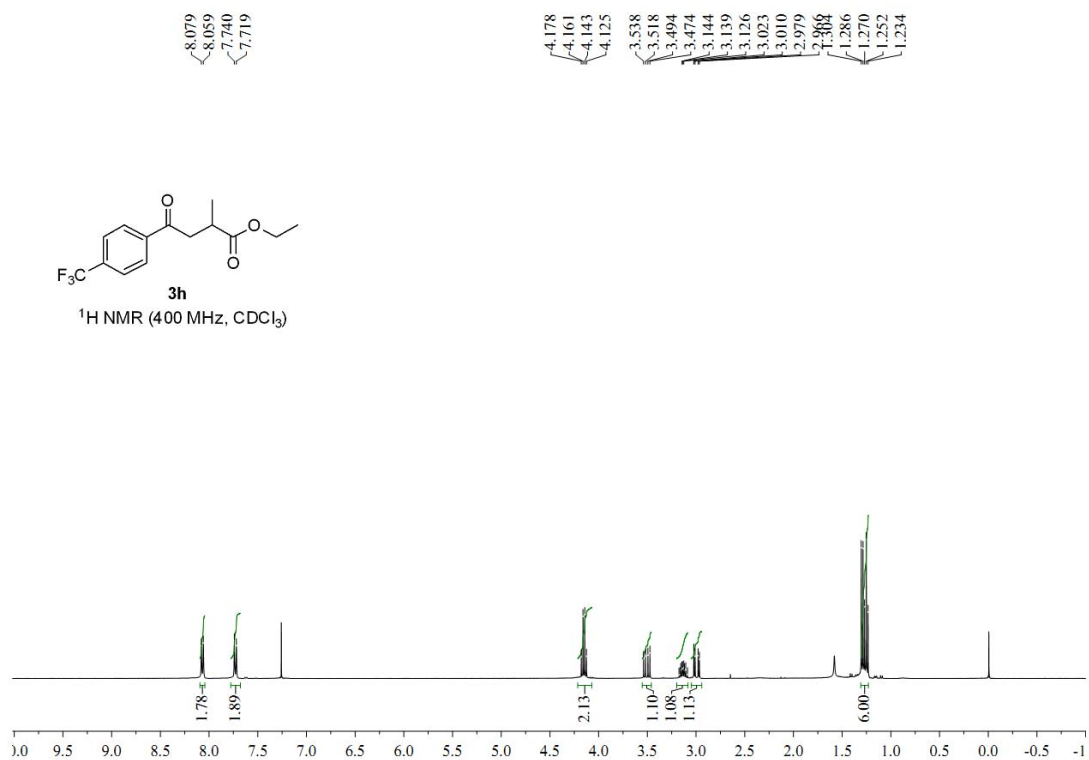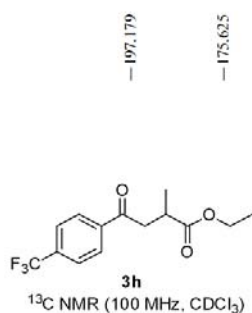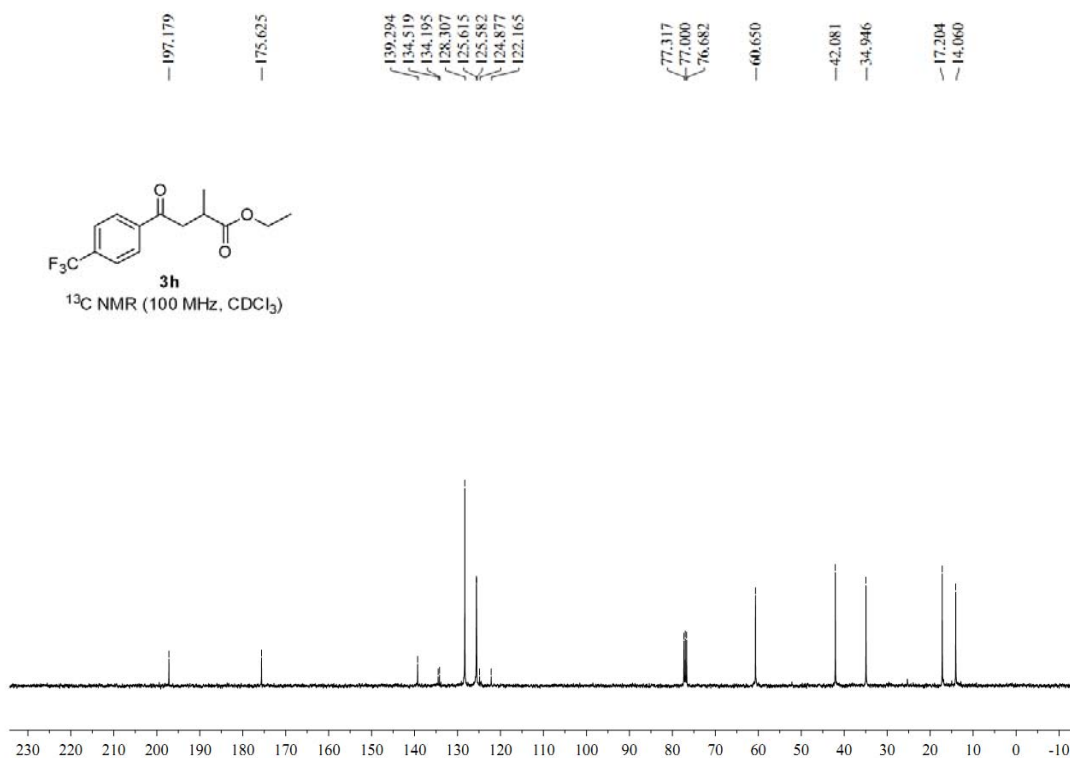

-63.550

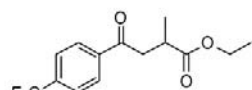

3h

<sup>19</sup>F NMR (376 MHz, CDCl<sub>3</sub>)

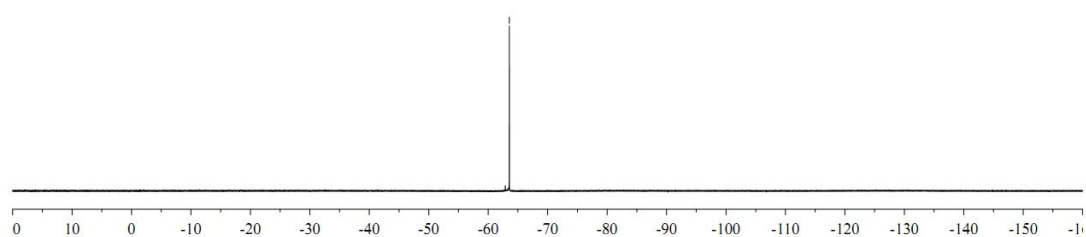

ethyl 4-(4-methoxyphenyl)-2-methyl-4-oxobutanoate (3i)

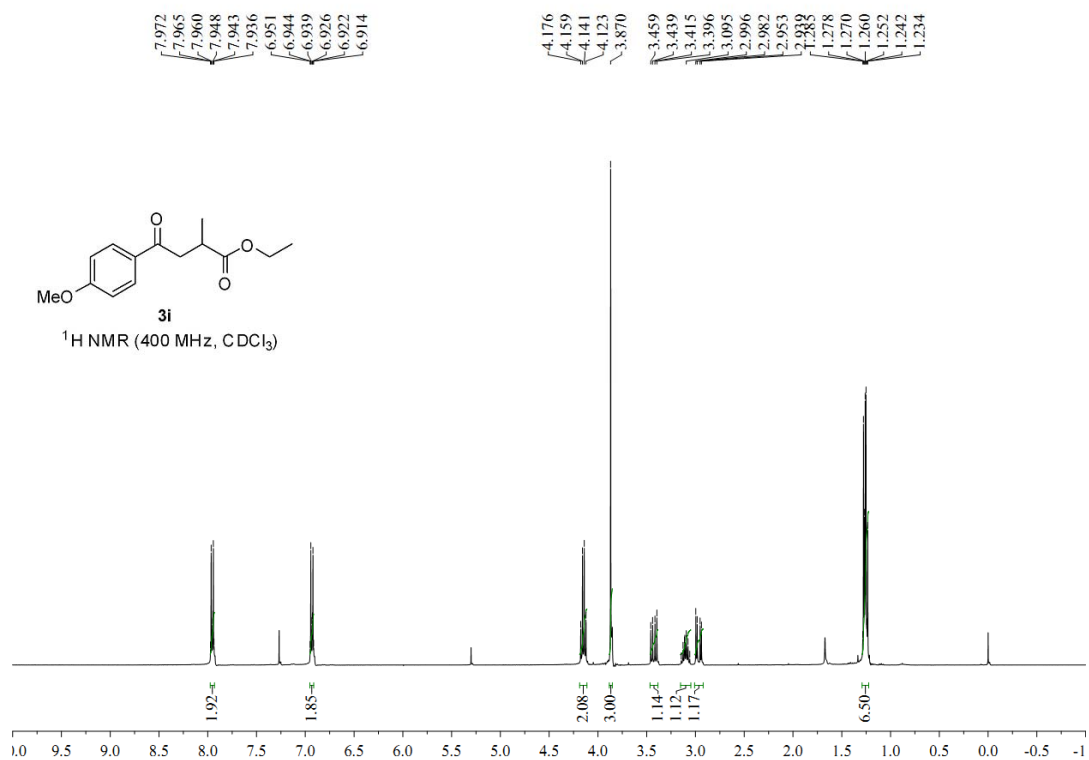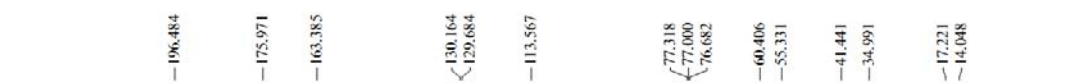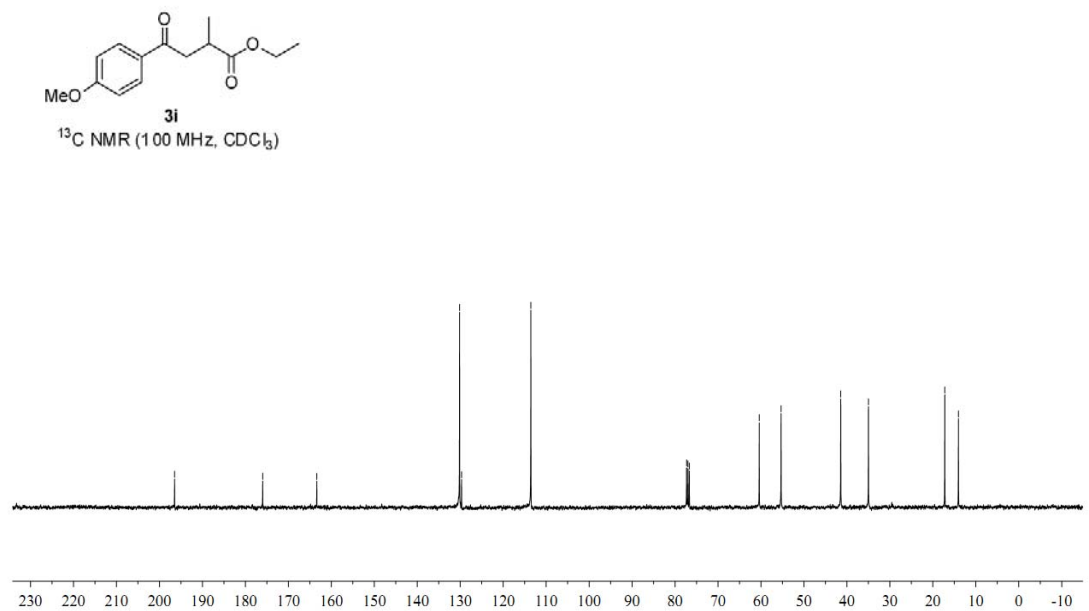

ethyl 2-methyl-4-oxo-4-(o-tolyl)butanoate (**3j**)

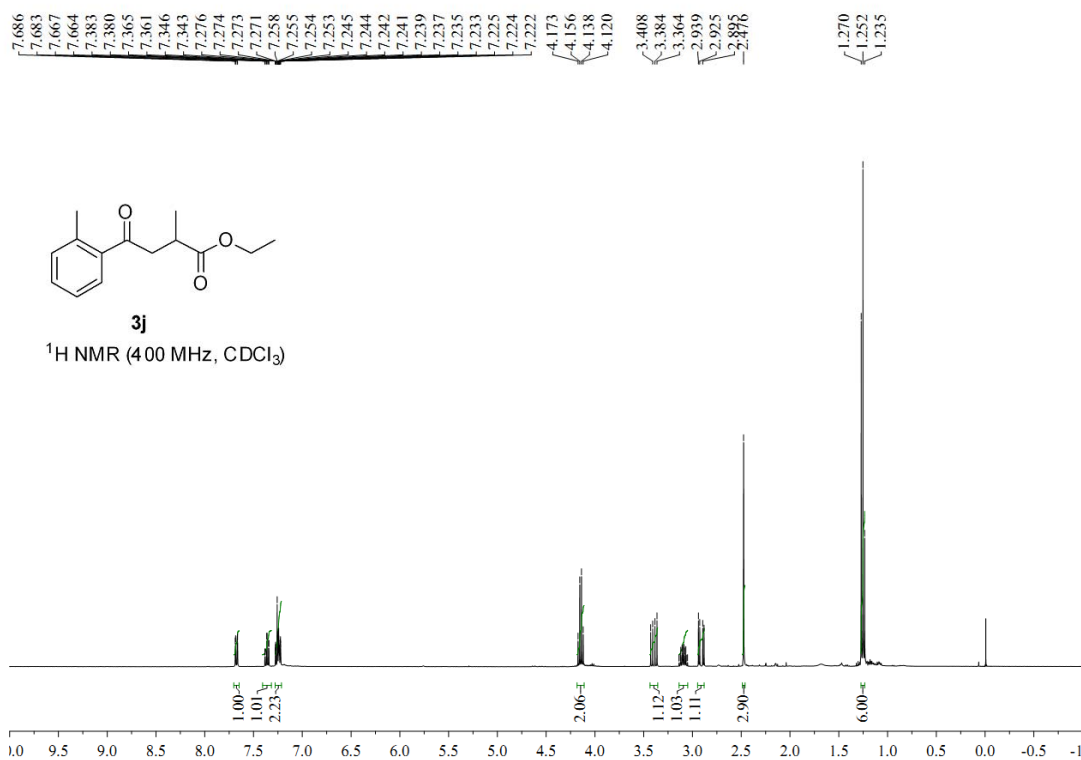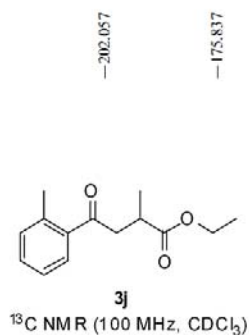



ethyl 2,3-dimethyl-4-oxo-4-phenylbutanoate (3k)

7.988  
7.987  
7.985  
7.981  
7.976  
7.973  
7.968  
7.964  
7.872  
7.559  
7.554  
7.549  
7.539  
7.535  
7.532  
7.487  
7.484  
7.483  
7.479  
7.471  
7.467  
7.463  
7.449  
7.445  
7.443  
4.099  
4.090  
4.080  
4.072  
4.062  
4.054  
4.044  
4.036  
4.027  
3.781  
3.763  
3.759  
3.741  
2.972  
2.954  
2.951  
2.932  
1.286  
1.268  
1.248  
1.230  
1.219  
1.212  
1.201  
1.192  
1.183  
1.180  
1.177  
1.163  
1.159  
1.145  
1.142  
1.125

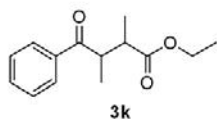

<sup>1</sup>H NMR (400 MHz, CDCl<sub>3</sub>)

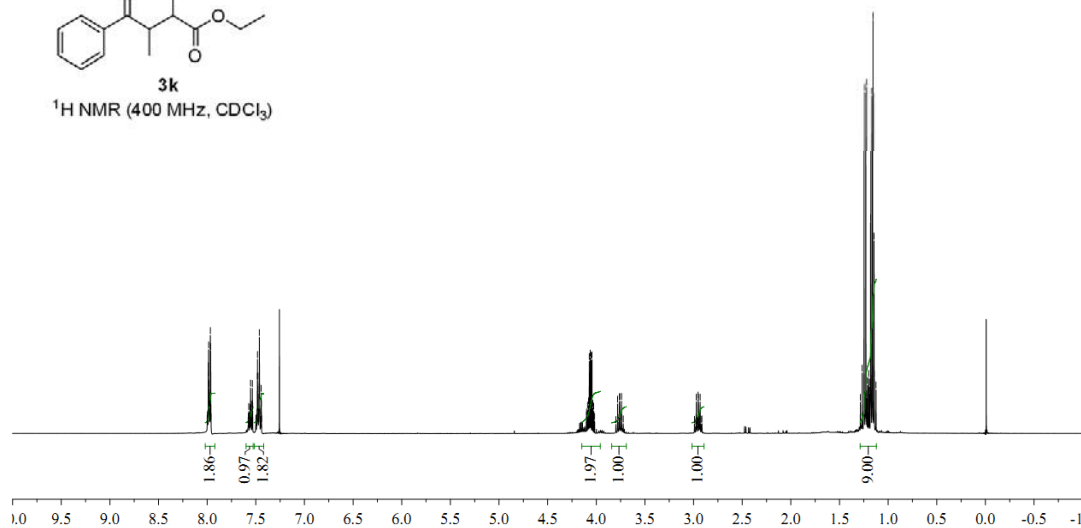

-203.437

-175.716

136.013

132.884

128.583

128.329

77.318

77.000

76.682

-60.522

43.017

41.725

14.500

14.112

14.033

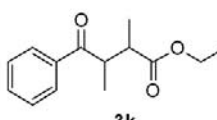

<sup>13</sup>C NMR (100 MHz, CDCl<sub>3</sub>)

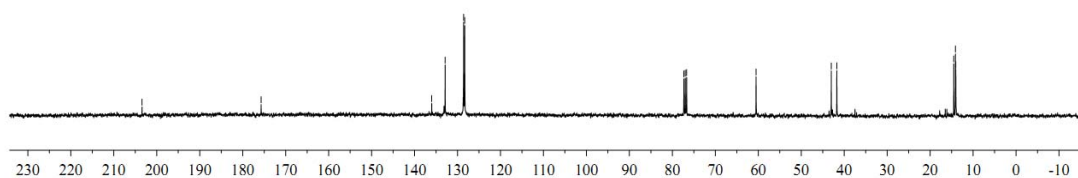

ethyl 2-(1-oxo-1,2,3,4-tetrahydronaphthalen-2-yl)propanoate (31)

8.035, 8.032, 8.015, 8.012, 7.487, 7.484, 7.469, 7.465, 7.450, 7.446, 7.319, 7.300, 7.281, 7.259, 7.249, 7.230, 4.226, 4.224, 4.208, 4.206, 4.190, 4.188, 4.172, 3.054, 3.052, 3.031, 3.020, 3.017, 2.203, 2.195, 2.170, 2.163, 1.988, 1.986, 1.289, 1.271, 1.175, 1.157

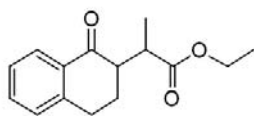

31

<sup>1</sup>H NMR (400 MHz, CDCl<sub>3</sub>)

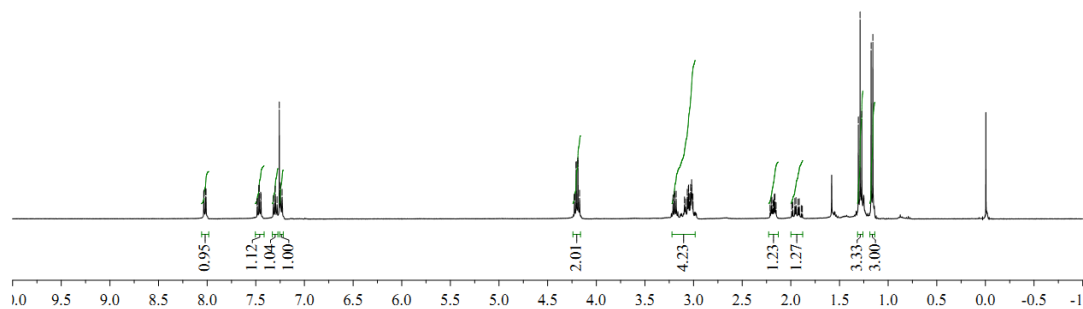

196.060, 176.072, 143.911, 133.332, 132.350, 128.617, 127.433, 126.589, 77.318, 77.000, 76.683, 60.483, 50.215, 38.692, 29.346, 25.192, 14.194, 13.140

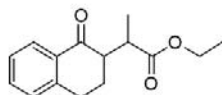

31

<sup>13</sup>C NMR (100 MHz, CDCl<sub>3</sub>)

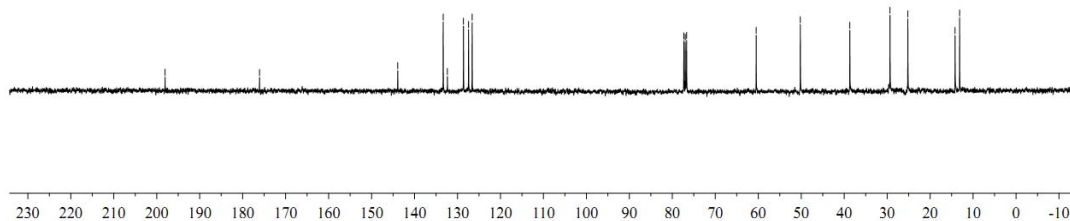

### methyl 2-methyl-4-oxo-4-phenylbutanoate (3m)

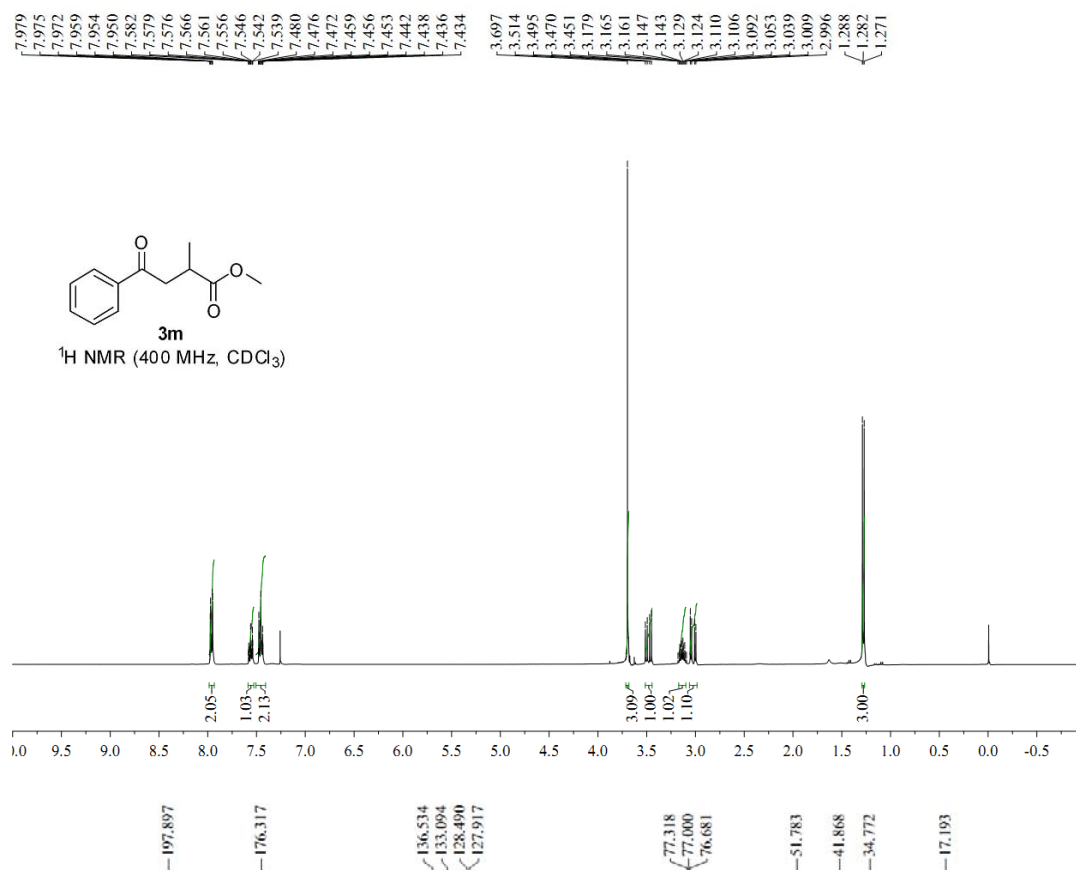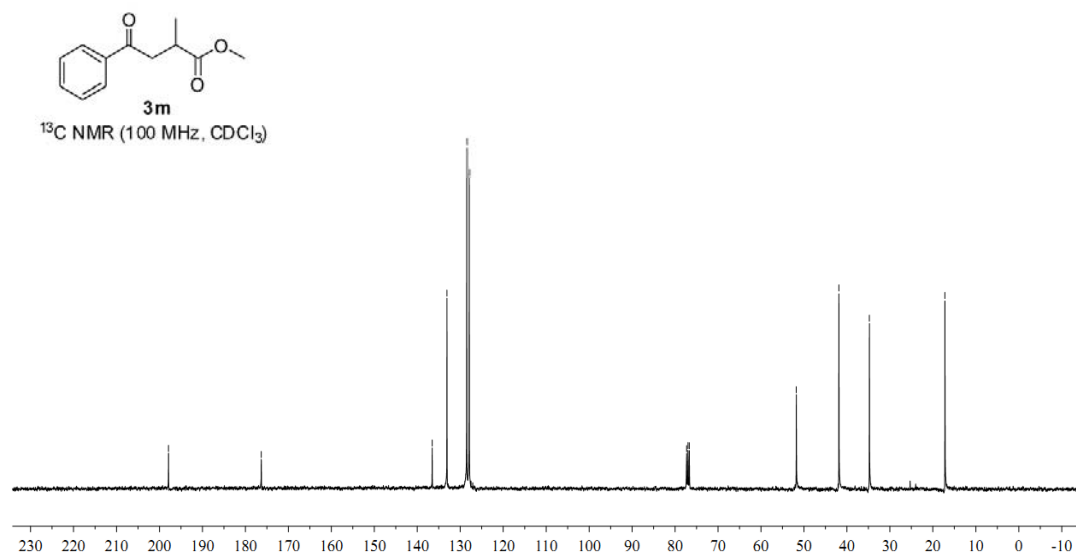

### isopropyl 2,2-dimethyl-4-oxo-4-phenylbutanoate (3n)

8.027  
8.025  
8.008  
8.004  
7.576  
7.561  
7.558  
7.554  
7.499  
7.496  
7.483  
7.480  
7.462  
7.460  
4.340  
4.322  
4.305  
4.110  
4.105  
4.101  
4.092  
4.087  
4.074  
4.070  
4.056  
4.052  
4.043  
2.842  
2.819  
2.800  
2.544  
2.527  
2.503  
2.486  
1.205  
1.187  
1.169

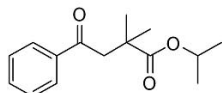

3n

<sup>1</sup>H NMR (400 MHz, CDCl<sub>3</sub>)

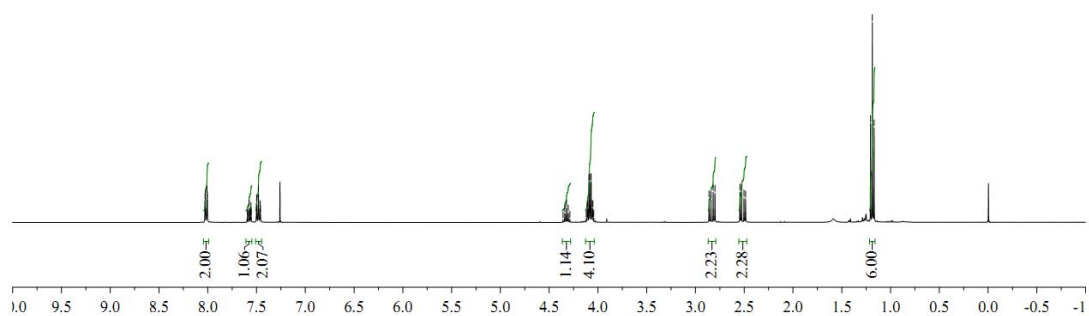

201.022  
171.349  
135.778  
133.240  
128.679  
128.512  
77.318  
77.000  
76.681  
60.829  
38.645  
36.005  
29.646  
14.023

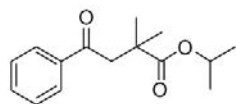

3n

<sup>13</sup>C NMR (100 MHz, CDCl<sub>3</sub>)

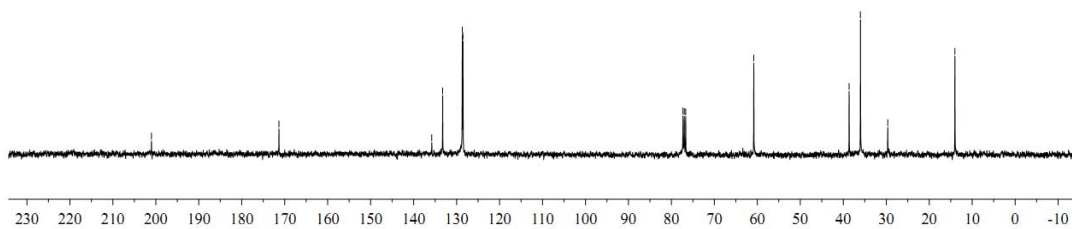

ethyl 2,2-dimethyl-4-oxo-4-phenylbutanoate (**3o**)

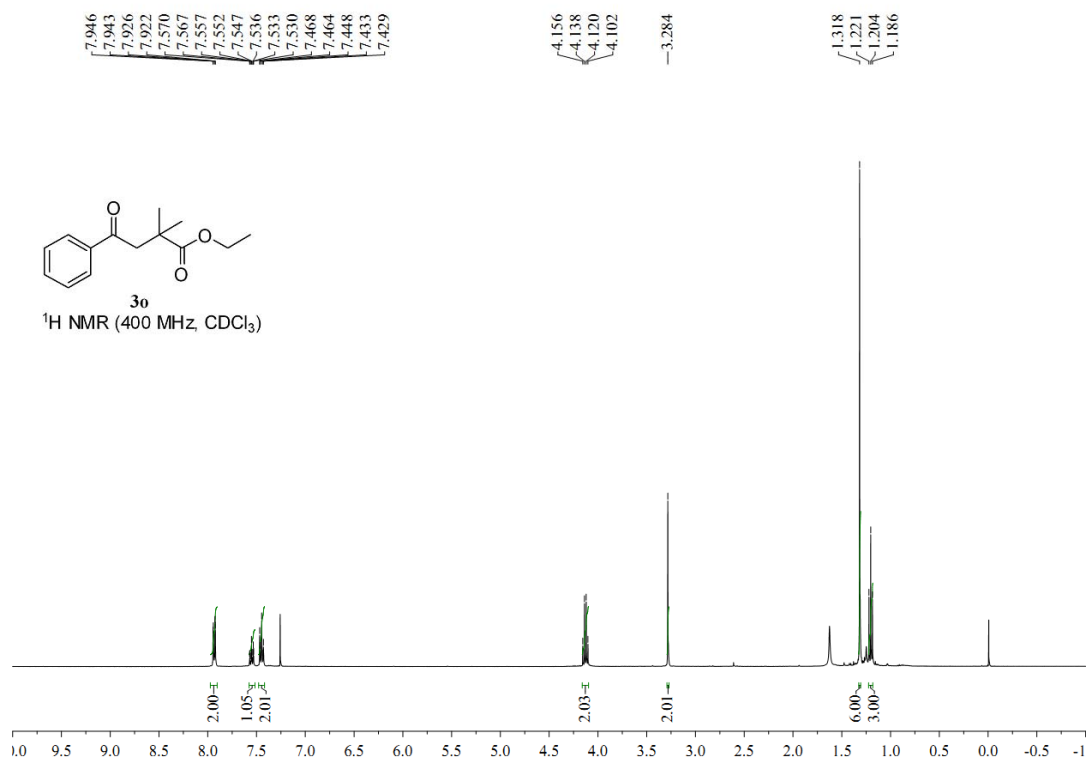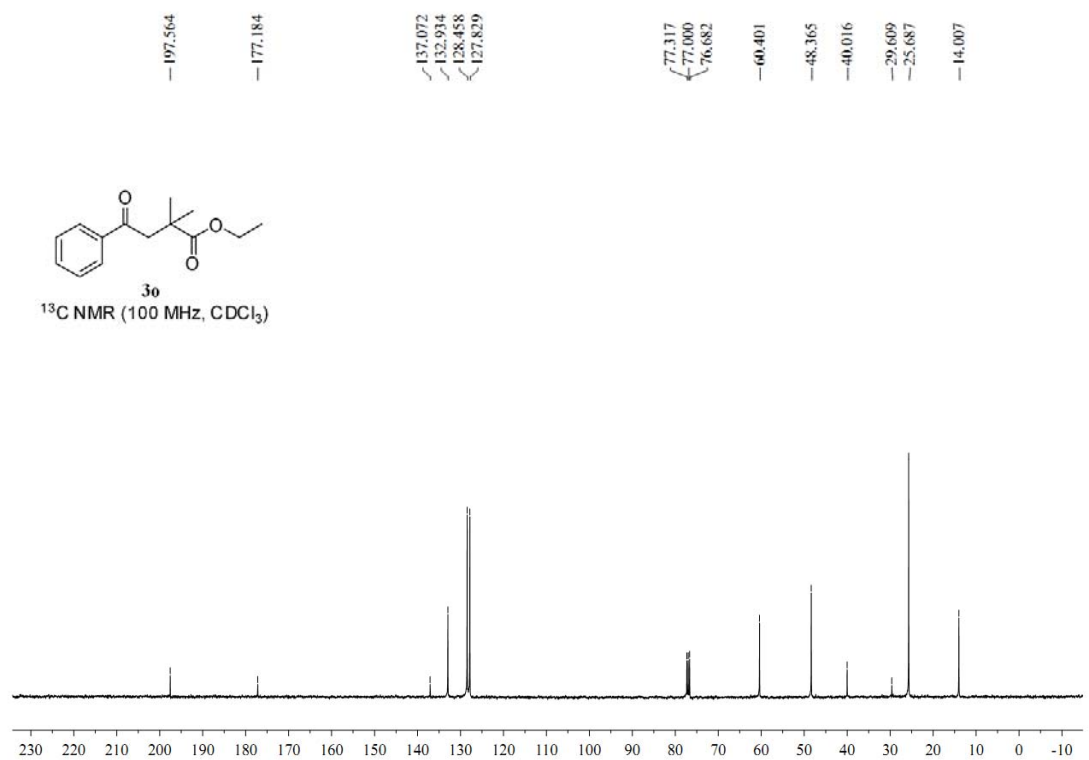

**ethyl 4-oxo-4-phenylbutanoate (3p)**

7.990, 7.987, 7.985, 7.975, 7.970, 7.966, 7.578, 7.560, 7.555, 7.544, 7.541, 7.538, 7.478, 7.477, 7.473, 7.460, 7.457, 7.454, 7.443, 7.439, 7.437, 4.183, 4.165, 4.147, 4.129, 3.323, 3.307, 3.290, 2.769, 2.753, 2.736, 1.277, 1.259, 1.241

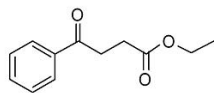

**3p**

<sup>1</sup>H NMR (400 MHz, CDCl<sub>3</sub>)

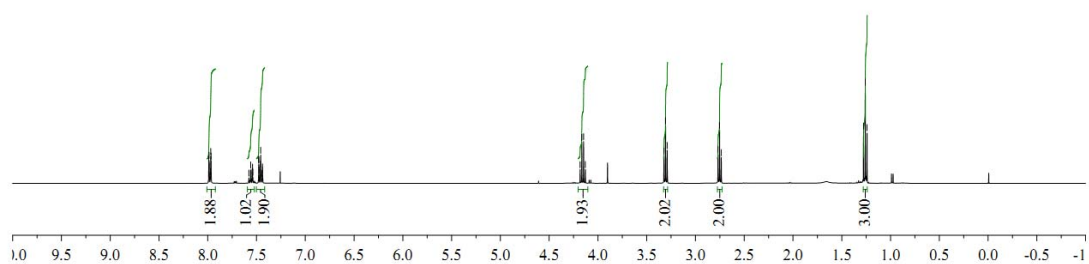

197.959, 172.697, 136.480, 128.451, 127.870, 77.317, 77.000, 76.685, 60.455, 33.247, 28.165, 14.045

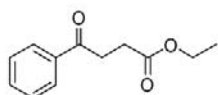

**3p**

<sup>13</sup>C NMR (100 MHz, CDCl<sub>3</sub>)

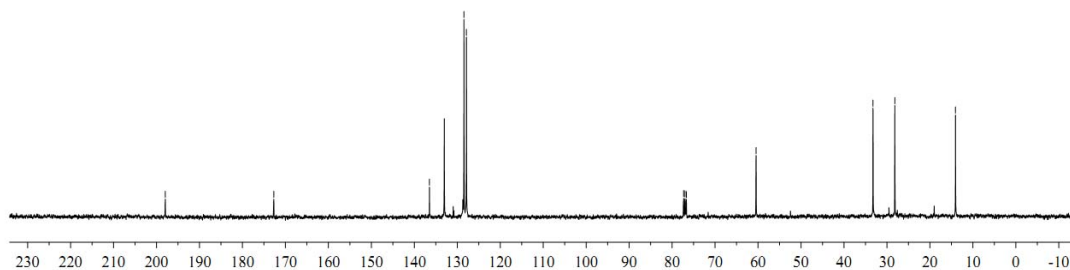

**cinnamyl 2-methyl-4-oxo-4-phenylbutanoate (3q)**

7.982  
7.964  
7.960  
7.456  
7.369  
7.318  
7.288  
7.268  
6.626  
6.307  
6.291  
6.275  
6.268  
6.252  
6.236  
4.773  
4.769  
4.765  
4.757  
4.753  
4.750  
3.545  
3.525  
3.501  
3.481  
3.215  
3.196  
3.182  
3.164  
3.075  
3.061  
3.031  
3.017  
1.325  
1.307

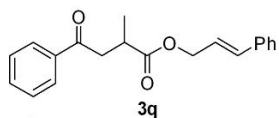

<sup>1</sup>H NMR (400 MHz, CDCl<sub>3</sub>)

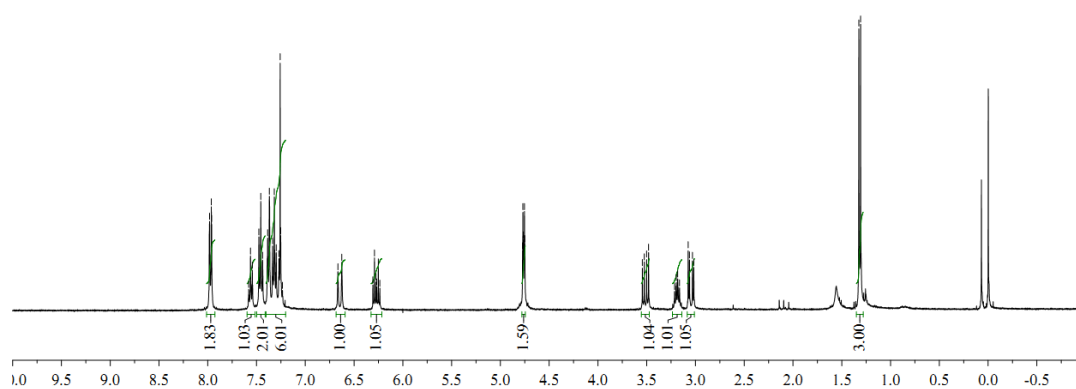

197.879  
175.603  
136.531  
136.162  
133.804  
133.093  
128.487  
128.464  
127.935  
127.878  
126.510  
123.138  
77.318  
77.000  
76.682  
65.110  
41.831  
34.966  
17.245

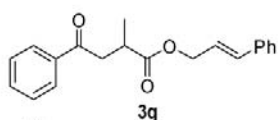

<sup>13</sup>C NMR (100 MHz, CDCl<sub>3</sub>)

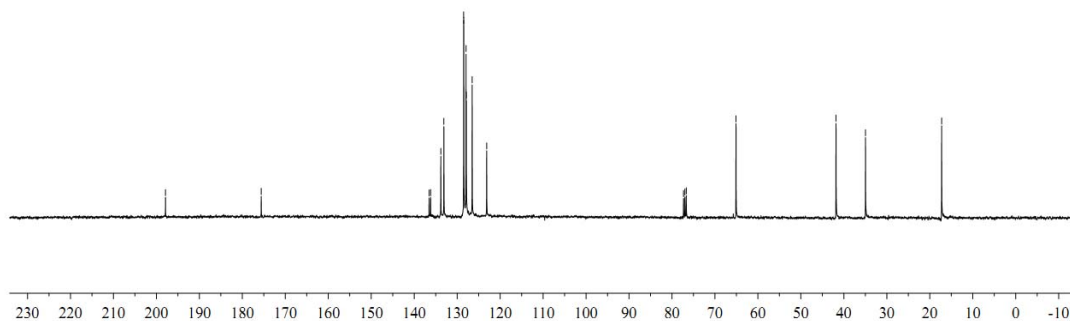

### allyl 4-oxo-2,4-diphenylbutanoate (3r)

7.987  
7.984  
7.972  
7.967  
7.963  
7.546  
7.543  
7.473  
7.469  
7.453  
7.435  
7.365  
7.359  
7.349  
7.343  
7.329  
7.311  
7.305  
7.297  
7.289  
7.260  
5.862  
5.845  
5.819  
5.819  
5.228  
5.188  
5.185  
5.172  
5.168  
5.165  
5.146  
5.142  
4.633  
4.630  
4.626  
4.620  
4.616  
4.612  
4.607  
4.603  
4.599  
4.593  
4.589  
4.585  
4.349  
4.338  
4.323  
4.313  
3.998  
3.972  
3.953  
3.927  
3.314  
3.304  
3.269  
3.259

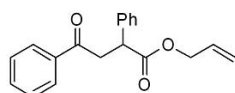

3r

<sup>1</sup>H NMR (400 MHz, CDCl<sub>3</sub>)

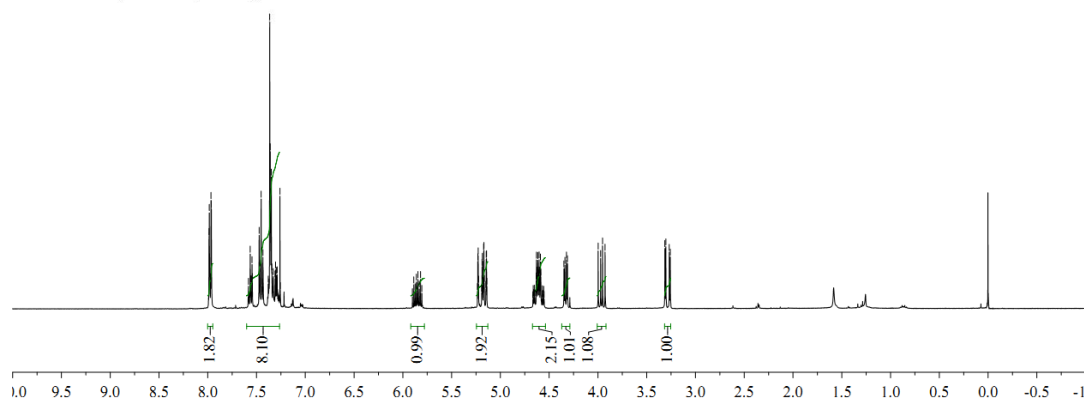

197.508  
172.956  
138.229  
136.300  
133.252  
131.899  
128.834  
128.535  
128.015  
127.792  
127.498  
117.825  
77.322  
77.004  
76.686  
65.510  
46.387  
42.677

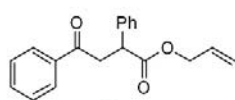

3r

<sup>13</sup>C NMR (100 MHz, CDCl<sub>3</sub>)

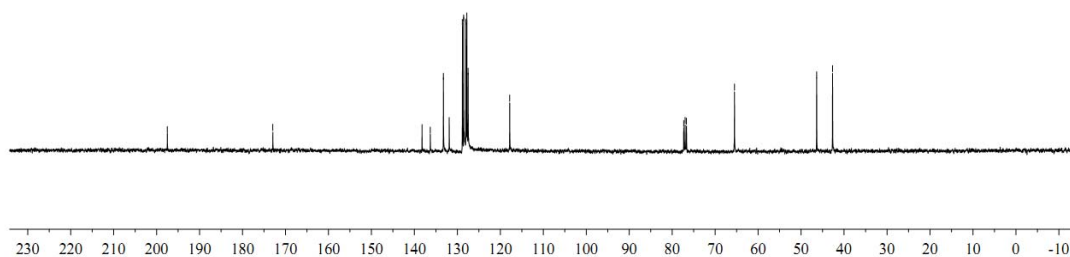

Supplement: c4cc05590j1.pdf [file c4cc05590j1.pdf]
